# Supplementary material for: Association of Antibacterial Susceptibility Profile with the Prevalence of Genes Encoding Efflux Proteins in the Bangladeshi Clinical Isolates of Staphylococcus aureus
Source: MDPI journal article supplement (doi:10.3390/antibiotics12020305), 2023-02-02
Supplement: s1 [file s1]

**Association of antibacterial susceptibility profile with the prevalence of genes encoding efflux proteins in the Bangladeshi clinical isolates of *Staphylococcus aureus***

Tanjina Akter Suma,<sup>1,†</sup> Nushrat Alam,<sup>1,†</sup> Sheikh Zahir Raihan,<sup>1\*</sup> Md. Al Zahid,<sup>2</sup> Shankar C. Mandal<sup>2</sup>, Fahrin Jahan Suchana,<sup>1</sup> Ripa Kundu,<sup>1</sup> Anwar Hossain,<sup>2</sup> Md. Abdul Muhit<sup>1\*</sup>

<sup>1</sup> *Department of Clinical Pharmacy and Pharmacology, Faculty of Pharmacy, University of Dhaka, Dhaka 1000, Bangladesh*

<sup>2</sup> *Department of Fisheries, University of Dhaka, Dhaka 1000, Bangladesh*

<sup>†</sup> *These authors contributed equally to this work*

\* Author for Correspondence: **Dr. Md. Abdul Muhit**

Professor

Department of Clinical Pharmacy and Pharmacology

University of Dhaka, Bangladesh

E-mail: [muhit@du.ac.bd](mailto:muhit@du.ac.bd)

Phone: +88-01733-982854

## Contents

|                                                                                |    |
|--------------------------------------------------------------------------------|----|
| 1. <i>Susceptibility Profiles of all Staphylococcus aureus bacteria:</i> ..... | 3  |
| 2. <i>Gel doc images of all genes</i> .....                                    | 18 |

**1. Susceptibility Profiles of all Staphylococcus aureus bacteria:**

|                   |  |                   |  |
|-------------------|--|-------------------|--|
|                   |  |                   |  |
| <b>Sample: 01</b> |  | <b>Sample: 02</b> |  |
|                   |  |                   |  |
| <b>Sample: 03</b> |  | <b>Sample: 04</b> |  |

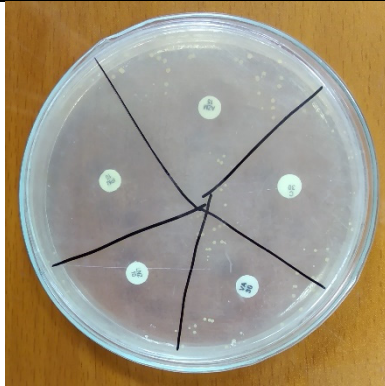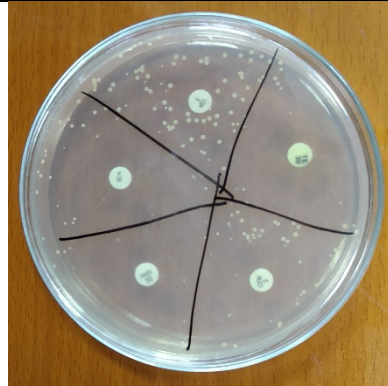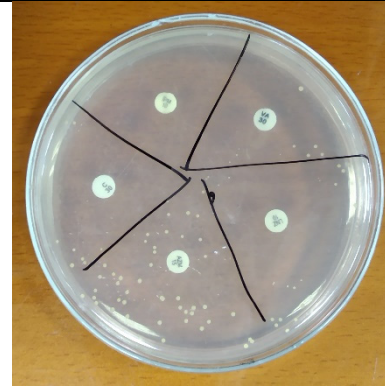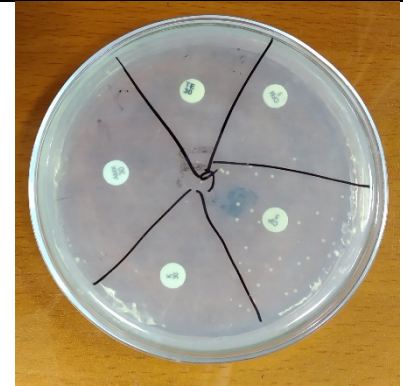

**Sample: 05**

**Sample: 06**

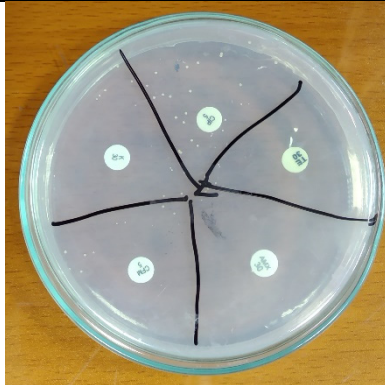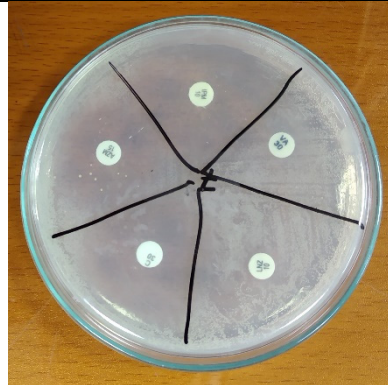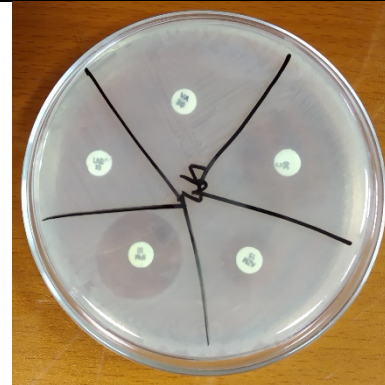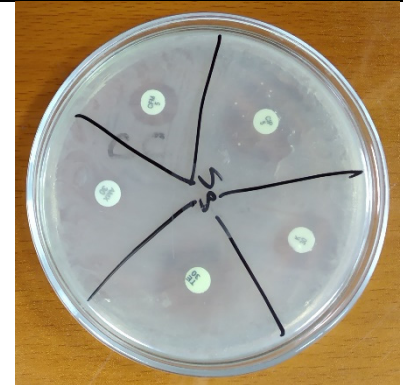

**Sample: 07**

**Sample: 08**



|                                                                                    |                                                                                     |                                                                                      |                                                                                      |
|------------------------------------------------------------------------------------|-------------------------------------------------------------------------------------|--------------------------------------------------------------------------------------|--------------------------------------------------------------------------------------|
| 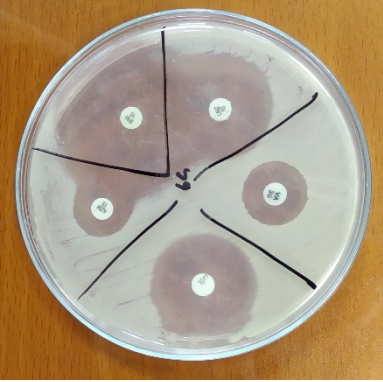  |   |   |   |
| <p><b>Sample: 09</b></p>                                                           |                                                                                     | <p><b>Sample: 10</b></p>                                                             |                                                                                      |
|  |  |  |  |
| <p><b>Sample: 11</b></p>                                                           |                                                                                     | <p><b>Sample: 12</b></p>                                                             |                                                                                      |

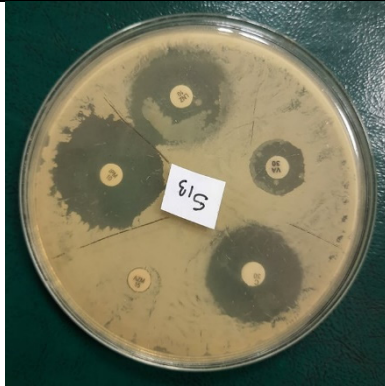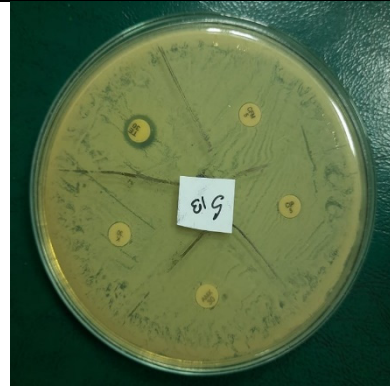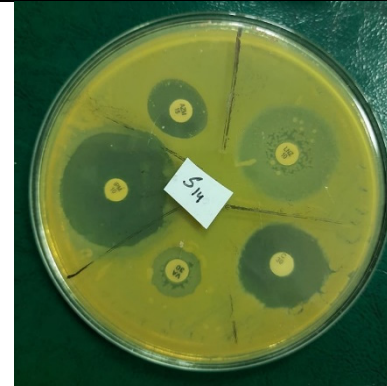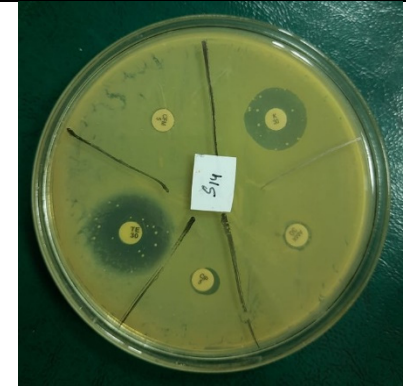

**Sample: 13**

**Sample: 14**

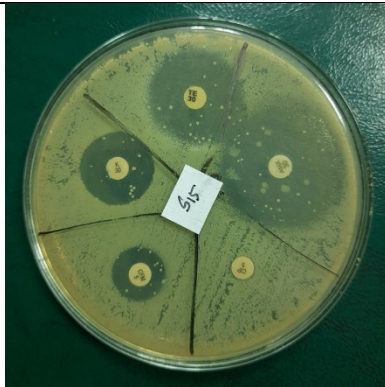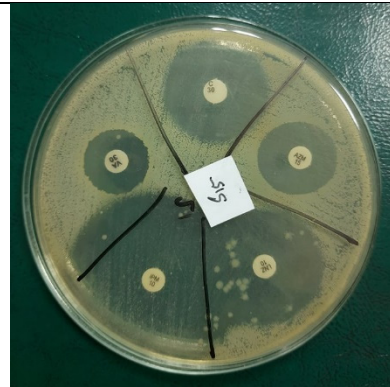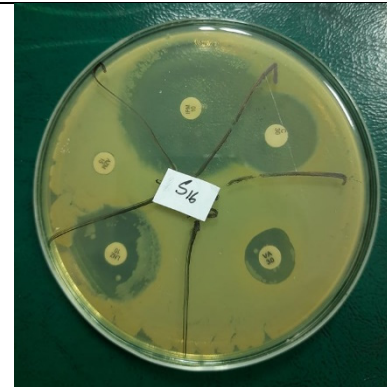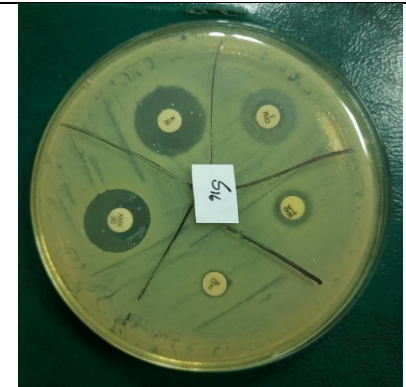

**Sample: 15**

**Sample: 16**



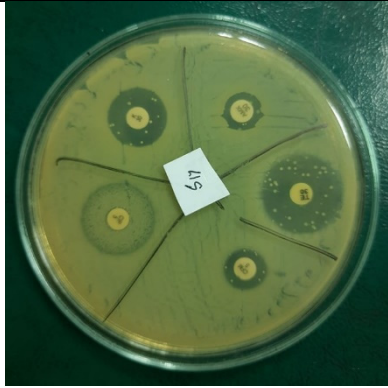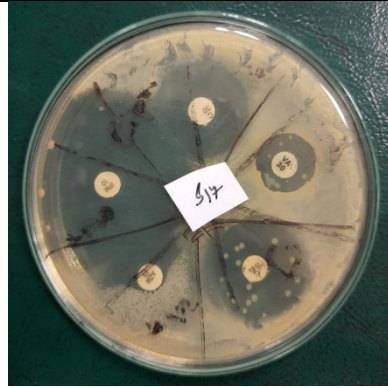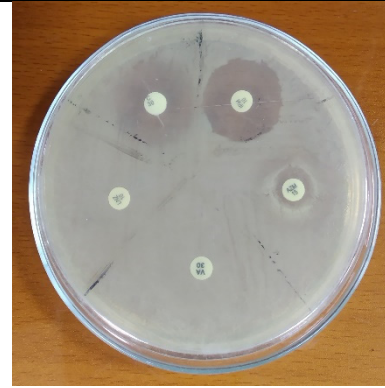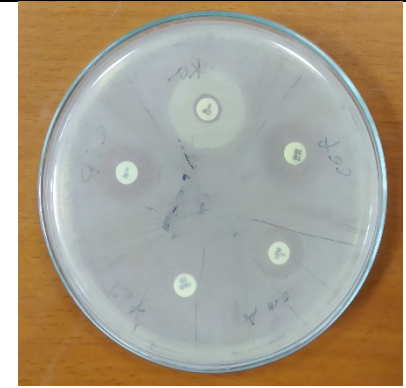

**Sample: 17**

**Sample: 18**

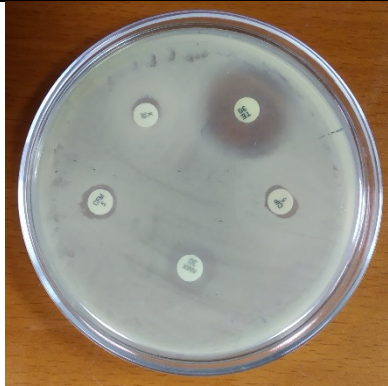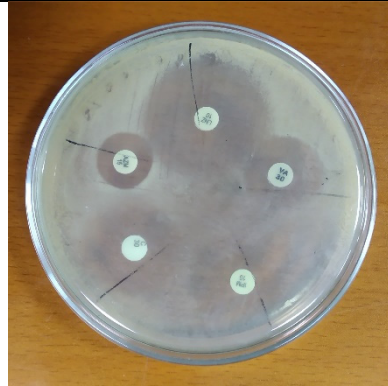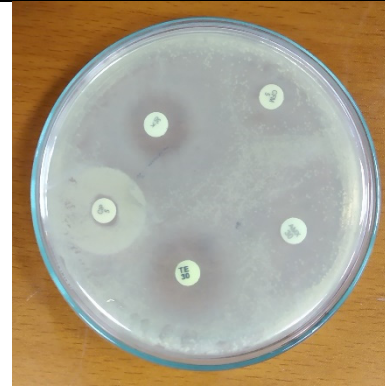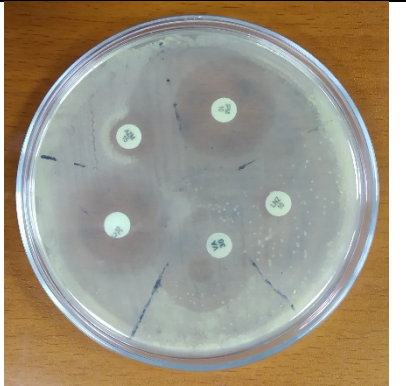

**Sample: 19**

**Sample: 20**

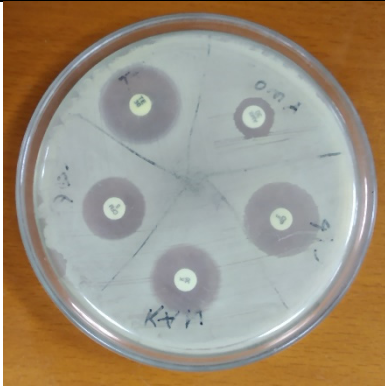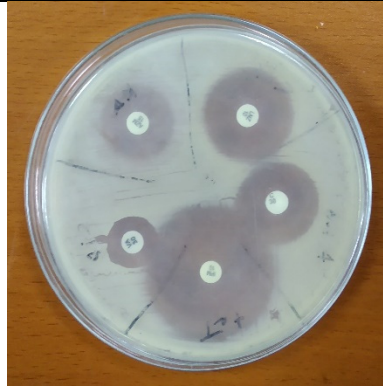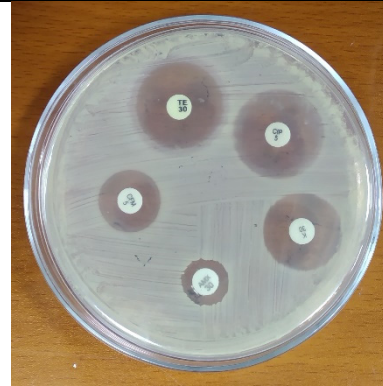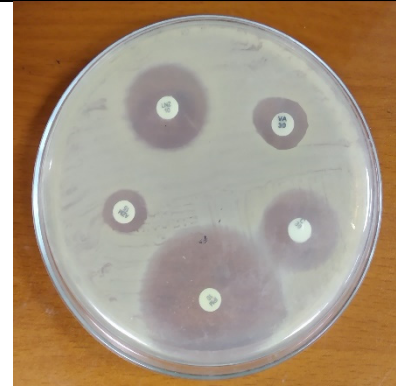

**Sample: 21**

**Sample: 22**

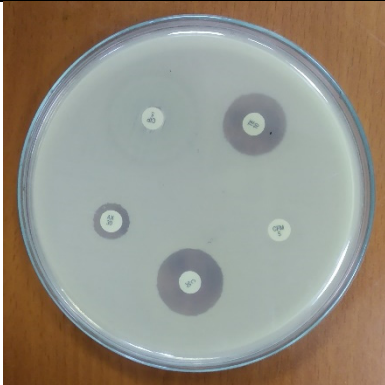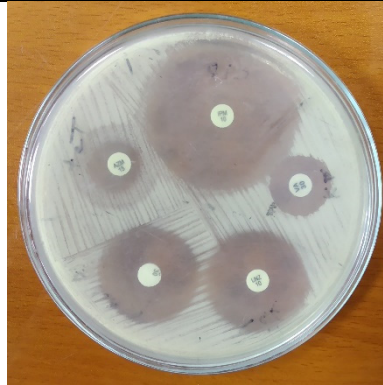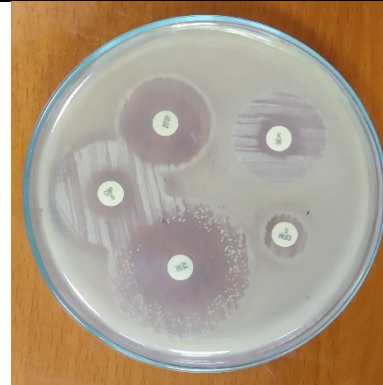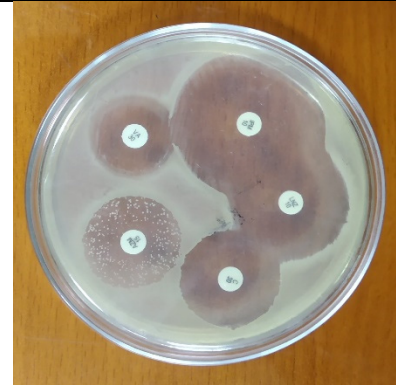

**Sample: 23**

**Sample: 24**



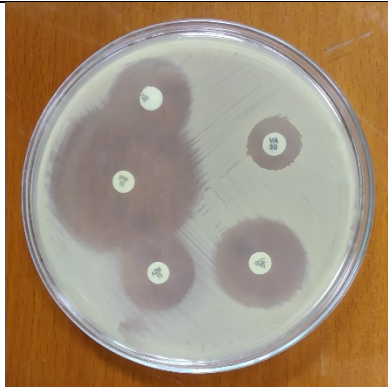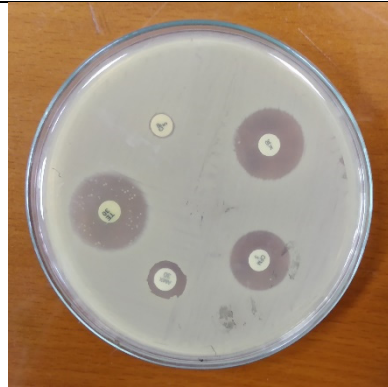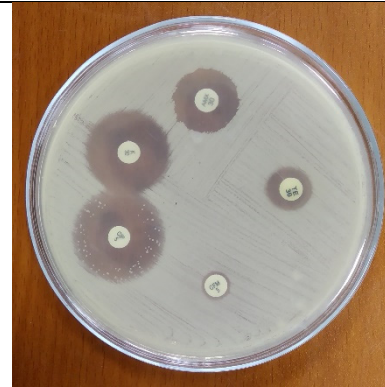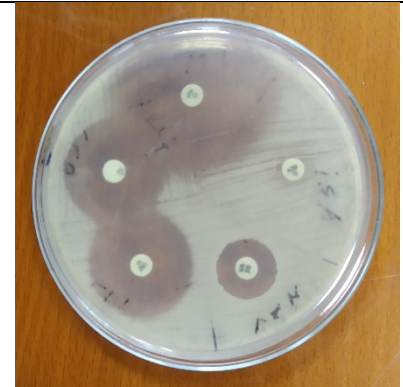

**Sample: 25**

**Sample: 26**

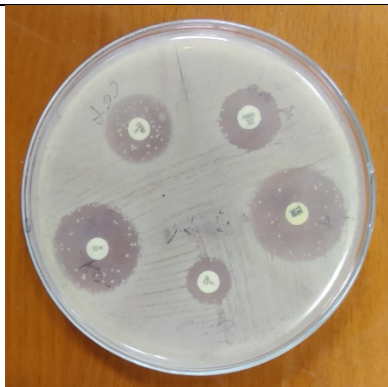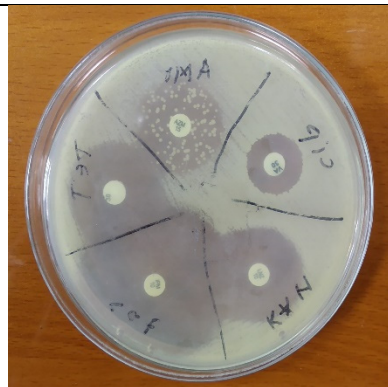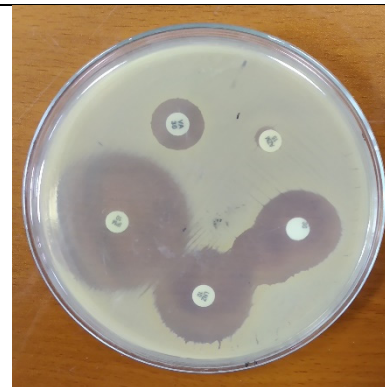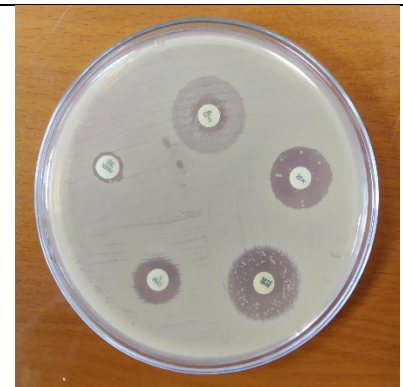

**Sample: 27**

**Sample: 28**

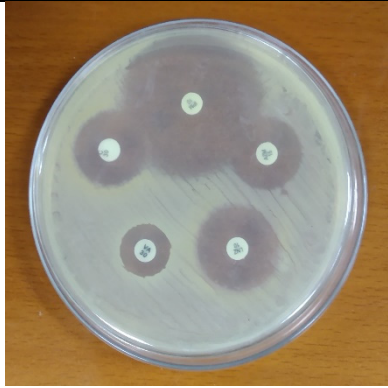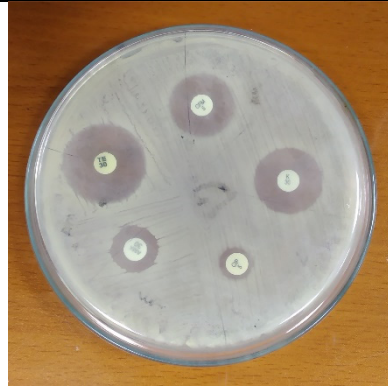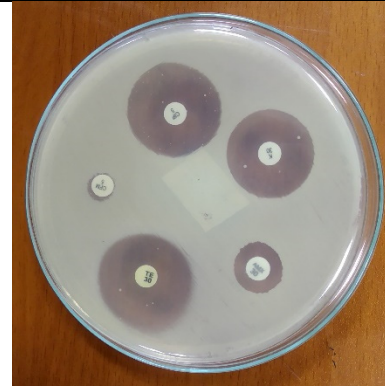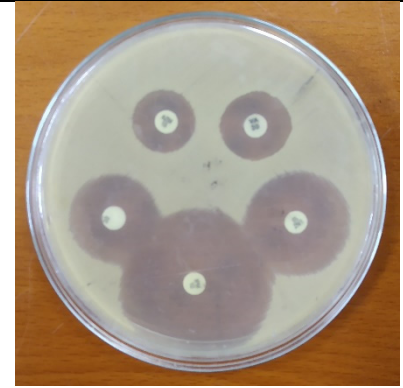

**Sample: 29**

**Sample: 30**

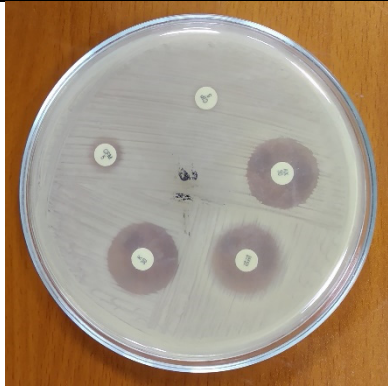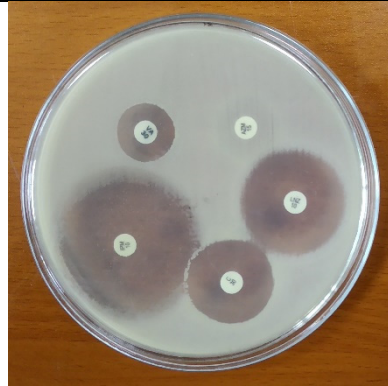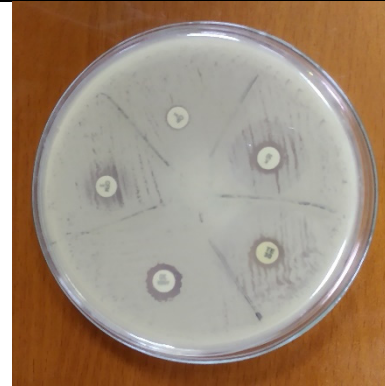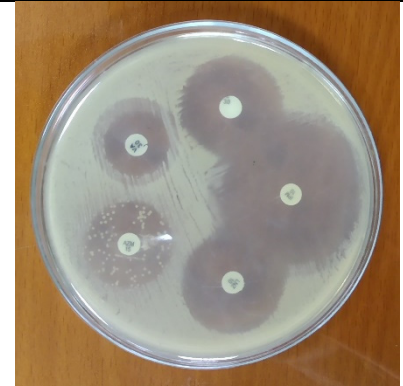

**Sample: 31**

**Sample: 32**



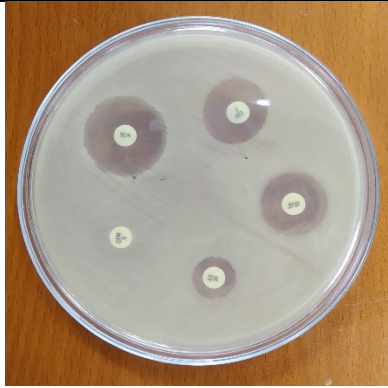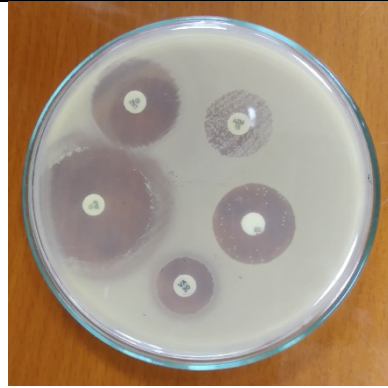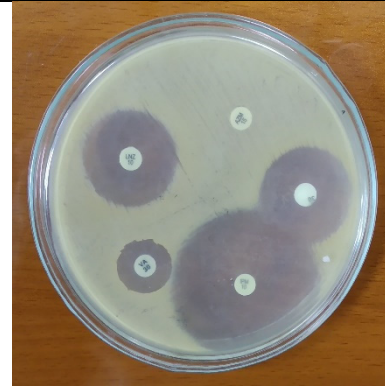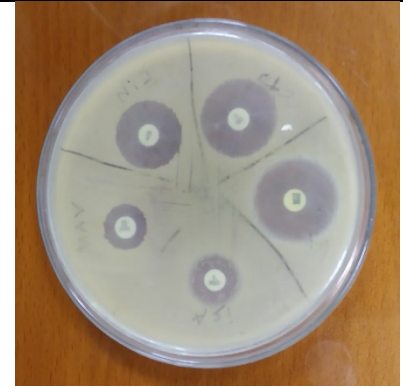

**Sample: 33**

**Sample: 34**

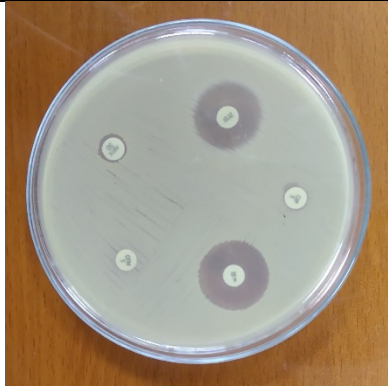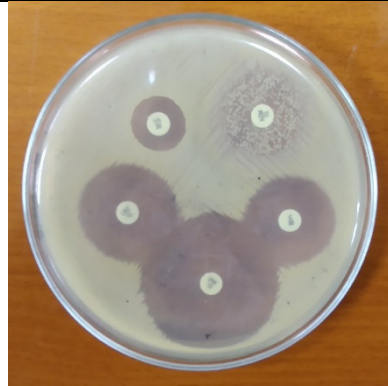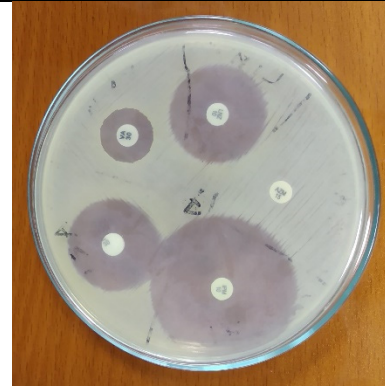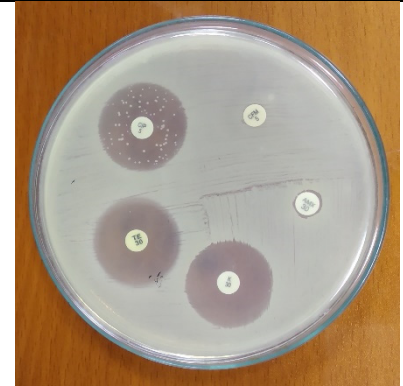

**Sample: 35**

**Sample: 36**

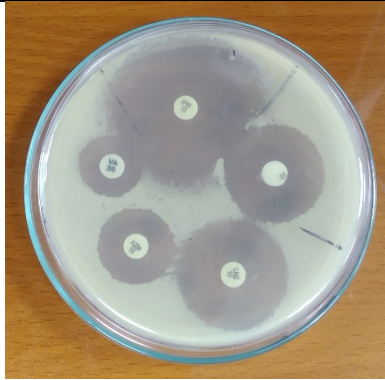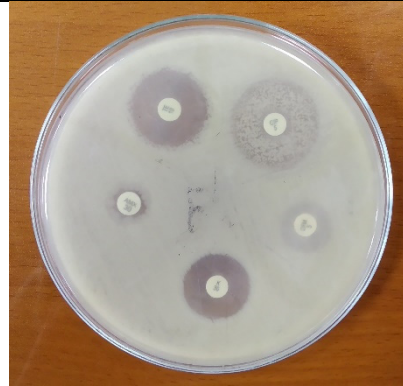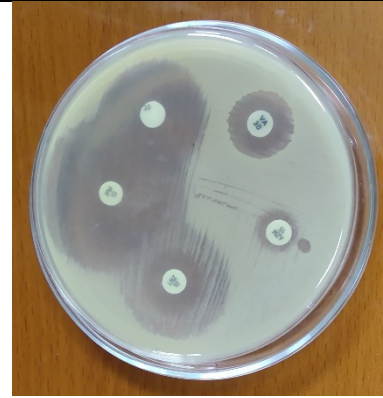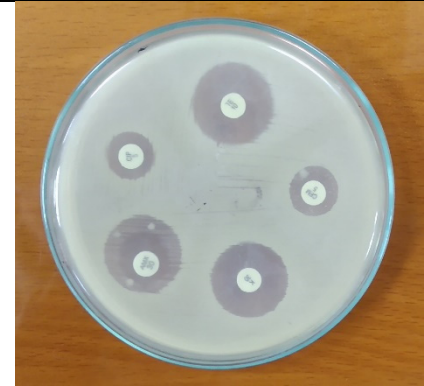

**Sample: 37**

**Sample: 38**

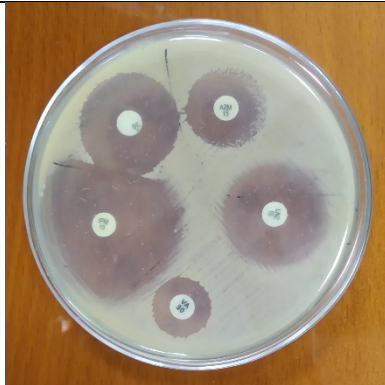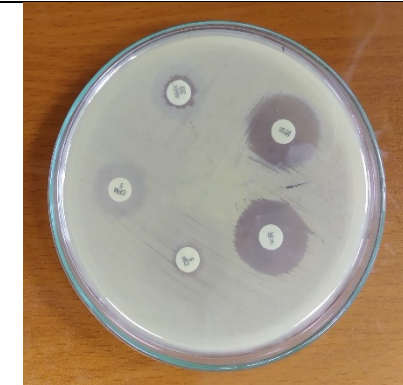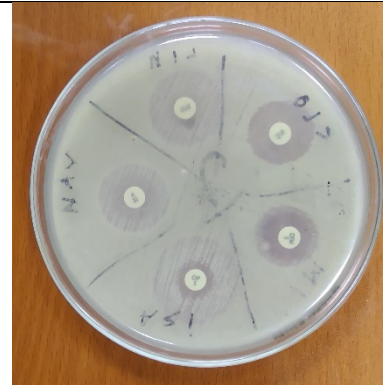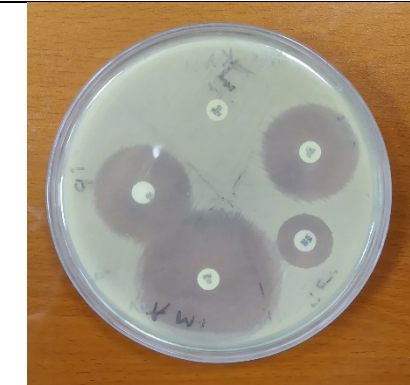

**Sample: 39**

**Sample: 40**



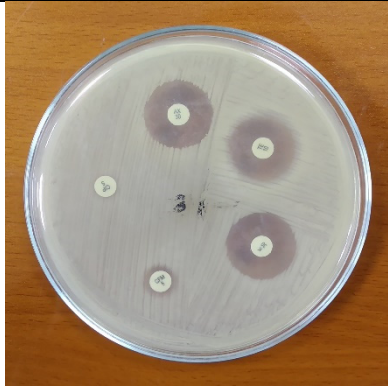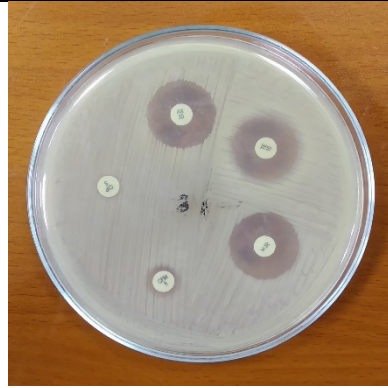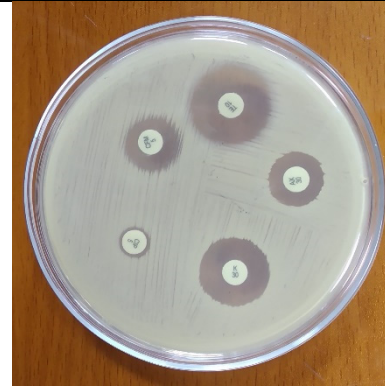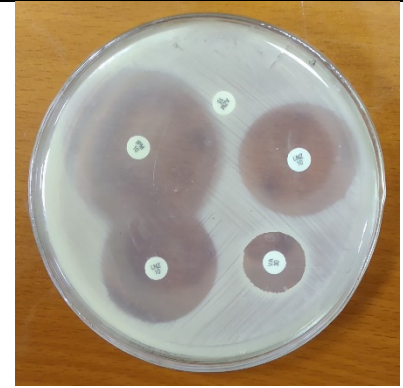

**Sample: 41**

**Sample: 42**

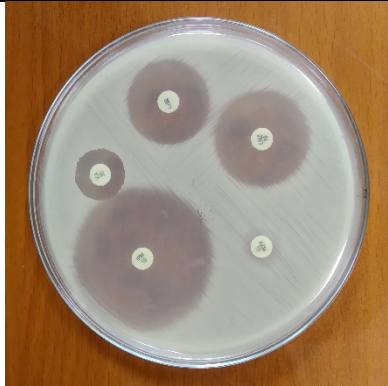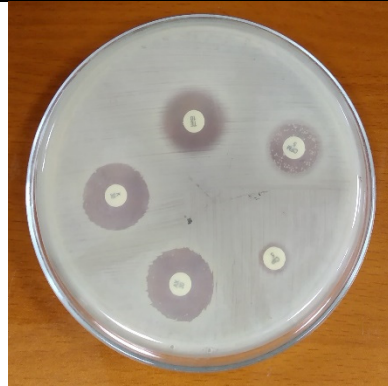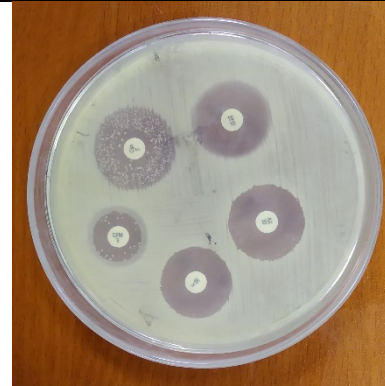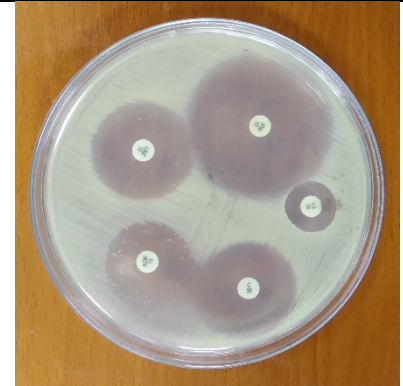

**Sample: 43**

**Sample: 44**

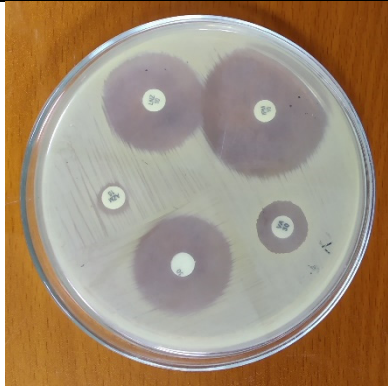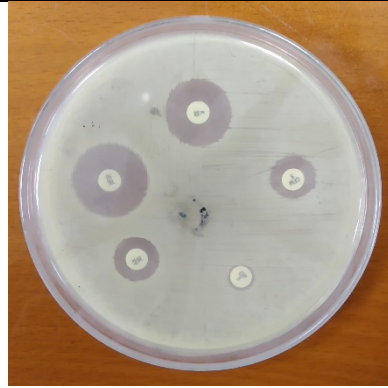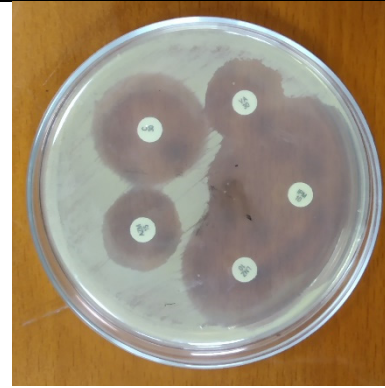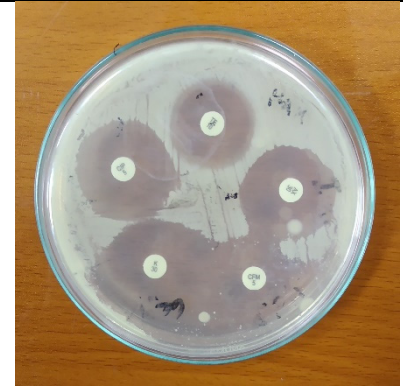

**Sample: 45**

**Sample: 46**

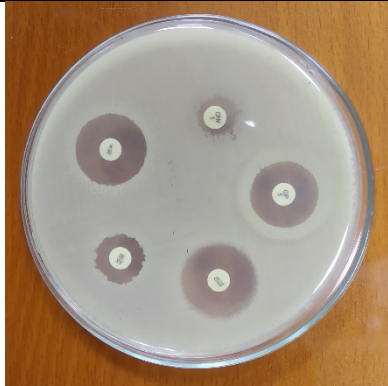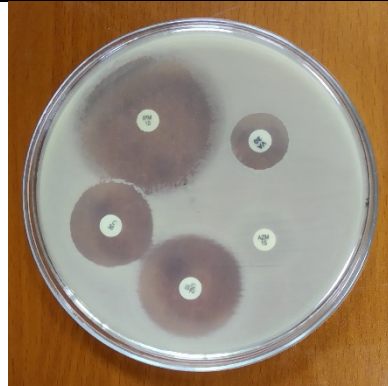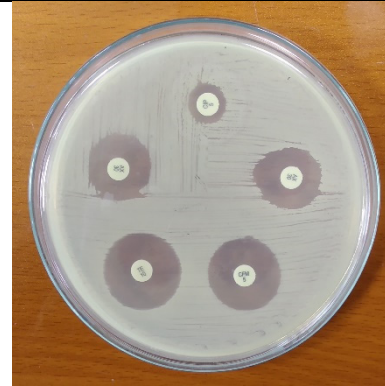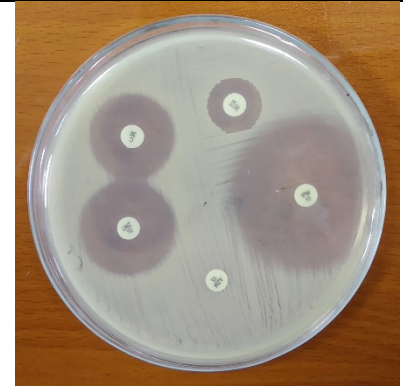

**Sample: 47**

**Sample: 48**



|                                                                                    |                                                                                     |                                                                                      |                                                                                      |
|------------------------------------------------------------------------------------|-------------------------------------------------------------------------------------|--------------------------------------------------------------------------------------|--------------------------------------------------------------------------------------|
| 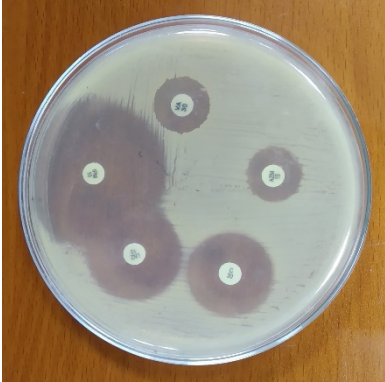  |   |   |   |
| <p><b>Sample: 49</b></p>                                                           |                                                                                     | <p><b>Sample: 50</b></p>                                                             |                                                                                      |
|  |  |  |  |
| <p><b>Sample: 51</b></p>                                                           |                                                                                     | <p><b>Sample: 52</b></p>                                                             |                                                                                      |

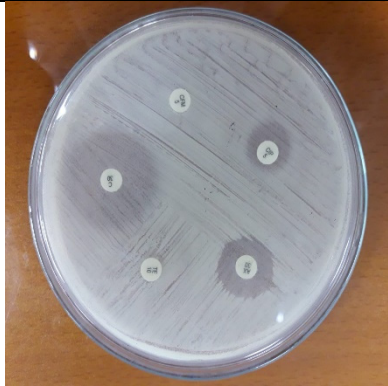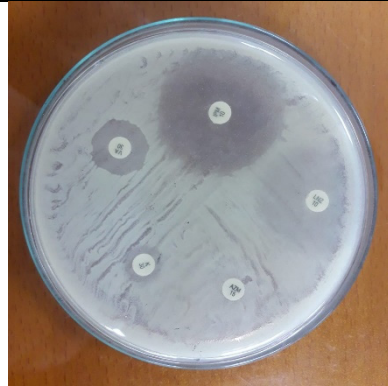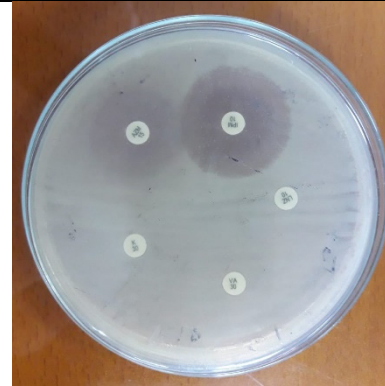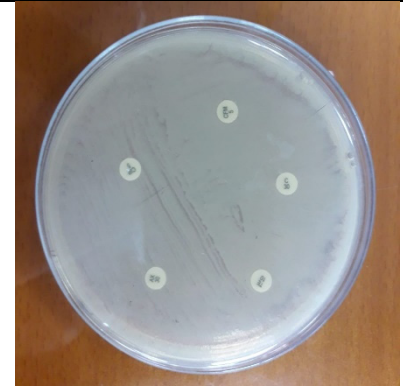

**Sample: 53**

**Sample: 54**

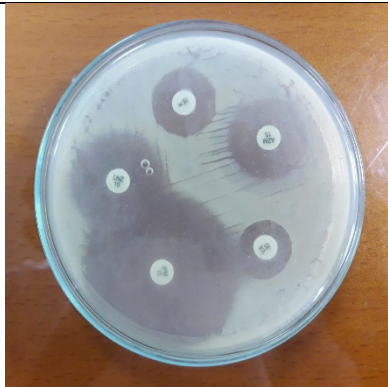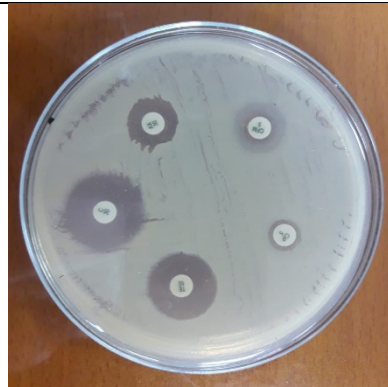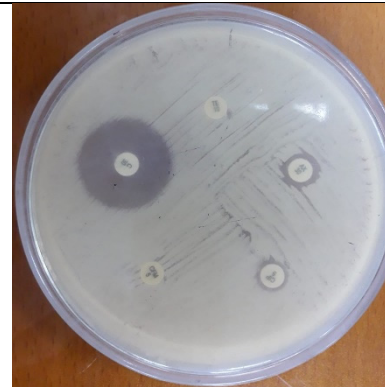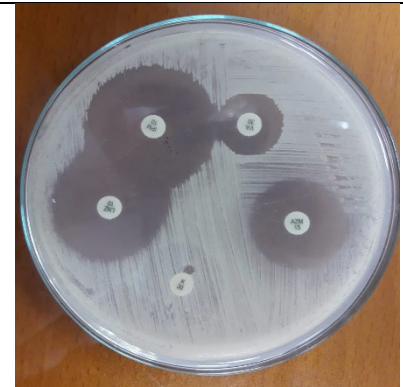

**Sample: 55**

**Sample: 56**



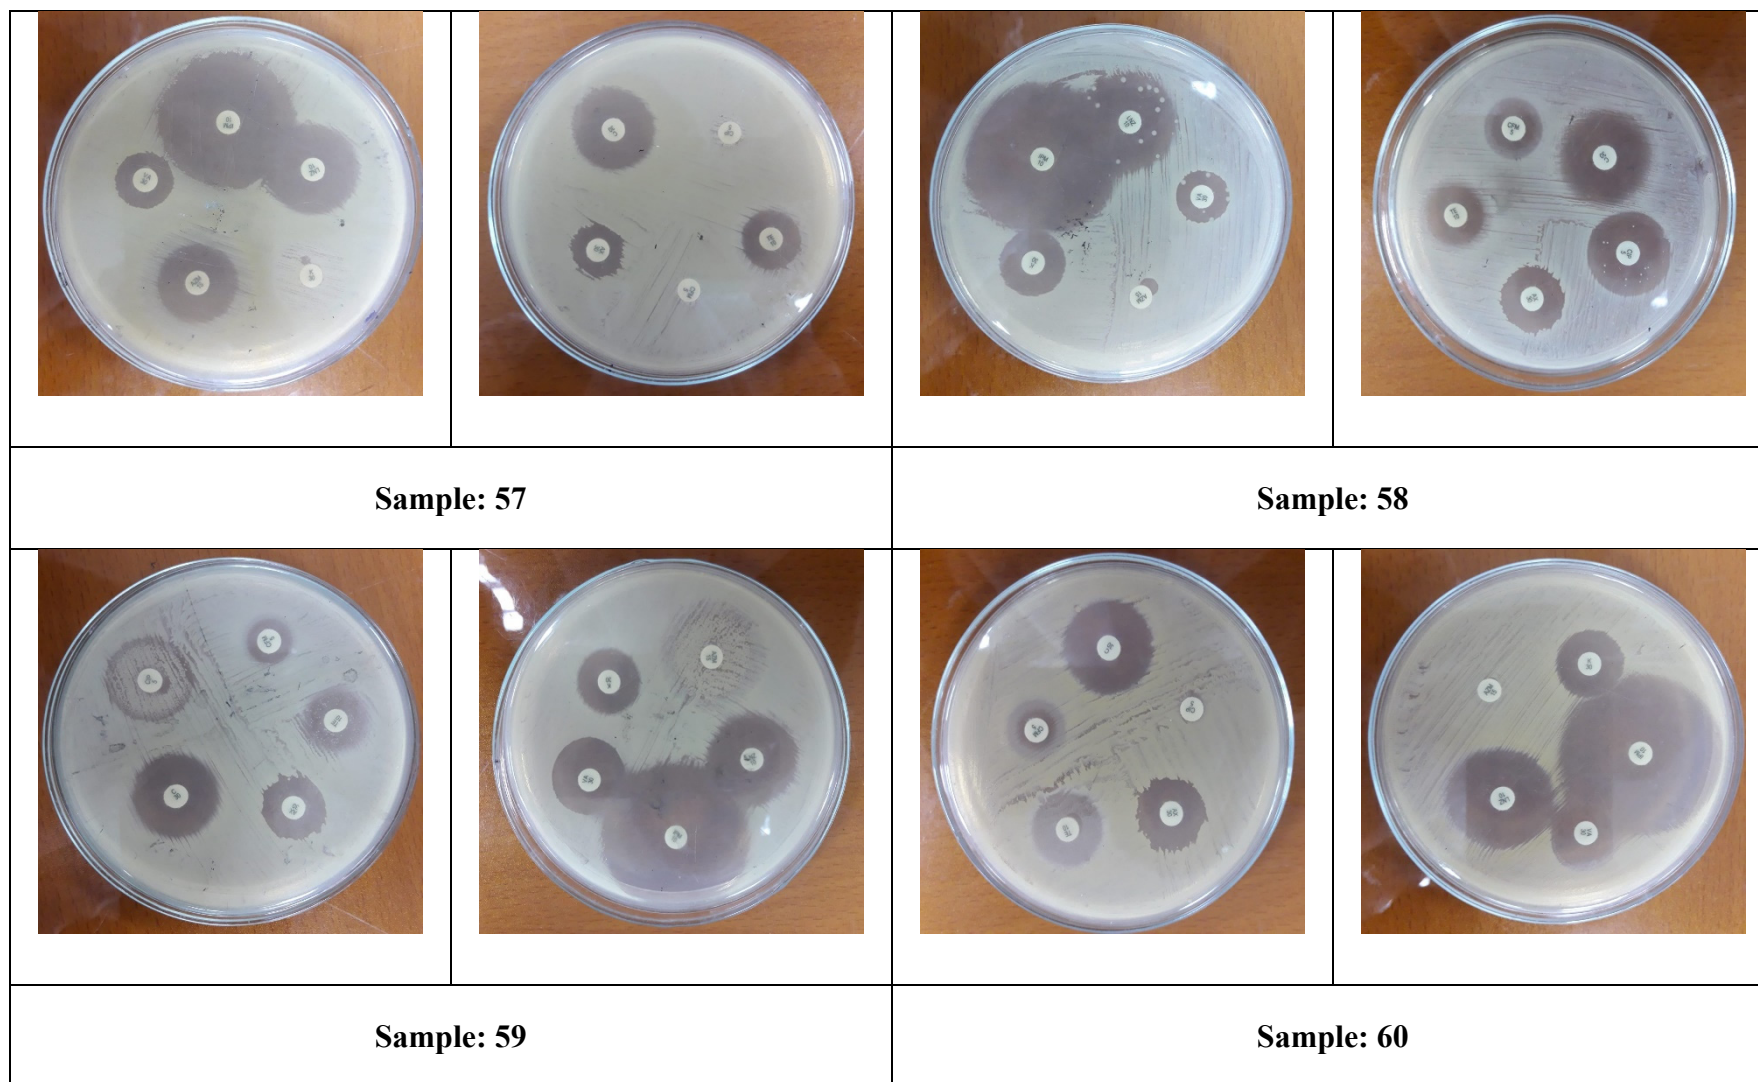

**Figure S1: Antibiotic Susceptibility Profile of Sixty Clinical Isolates of *Staphylococcus aureus***

## 2. Gel doc images of all genes

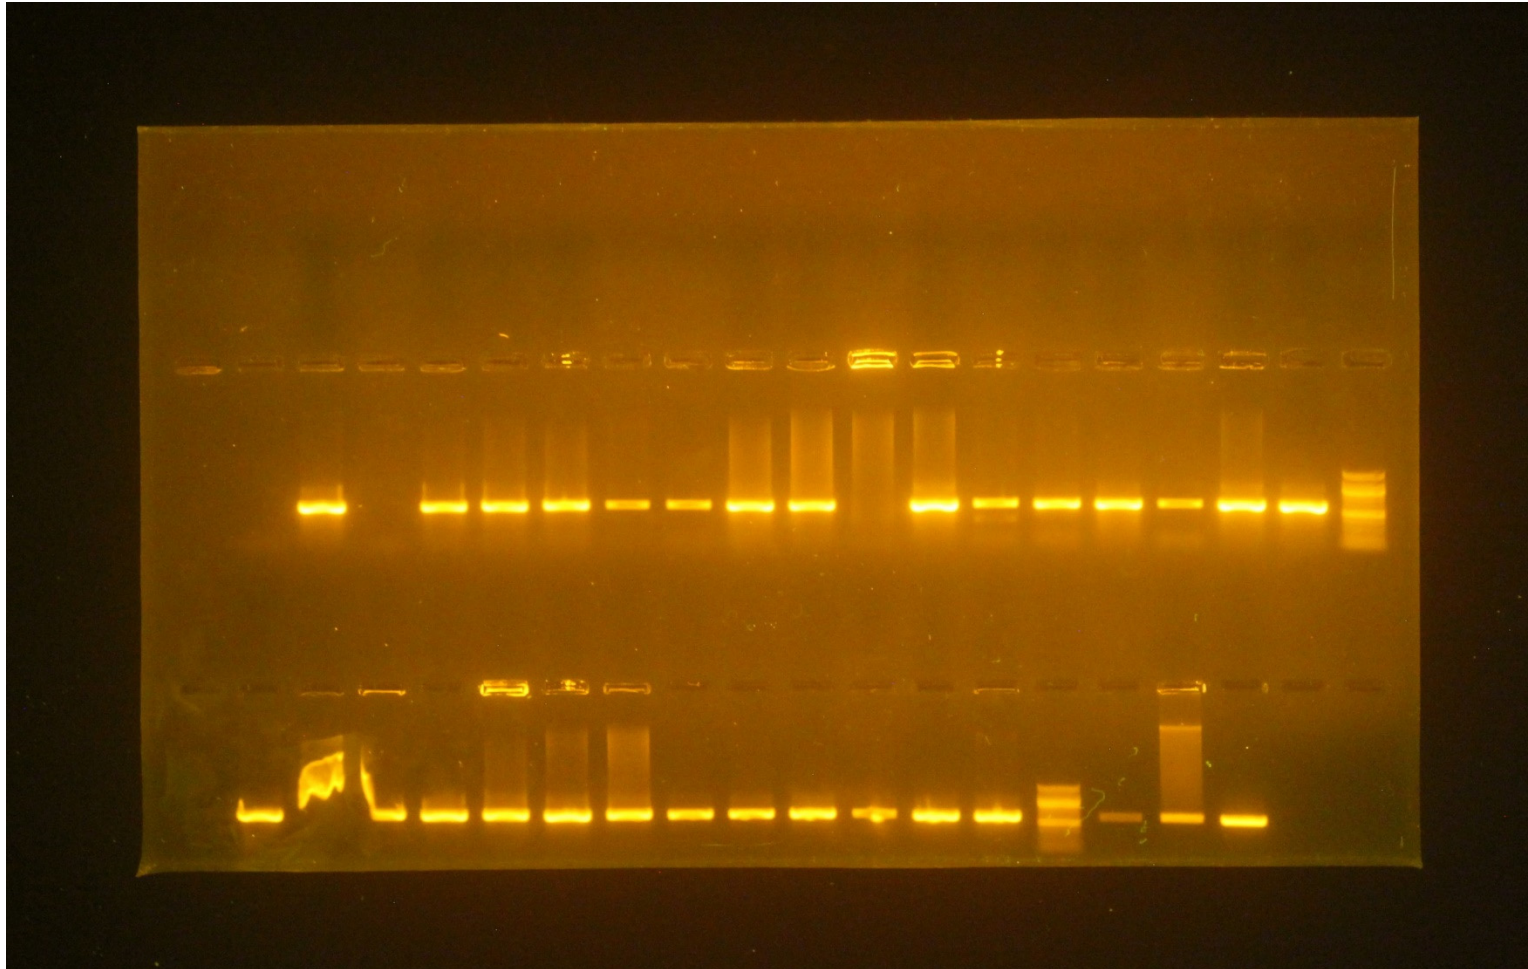

**Figure S2: Detection of the Presence of norA Gene (Sample 01-30) in the Clinical Isolates of *Staphylococcus aureus*.** Sample 7, 9 & 19 that were earlier checked to check the viability of the primer, were used as control in the second row.



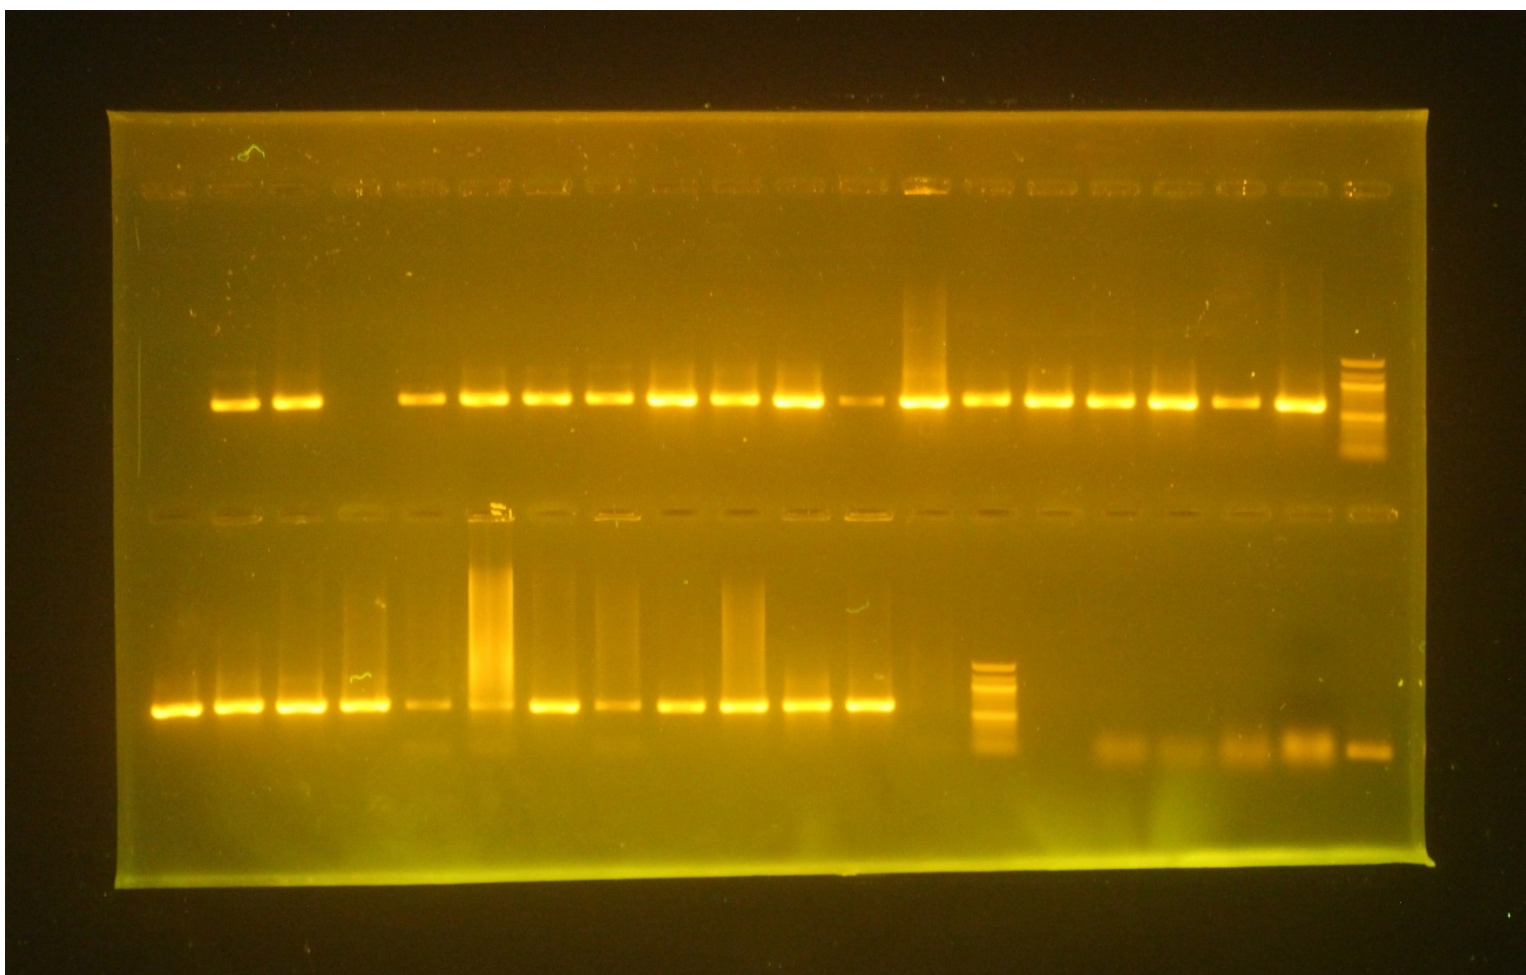

**Figure S3: Detection of the Presence of norA Gene (Sample 31-60) in the Clinical Isolates of *Staphylococcus aureus***

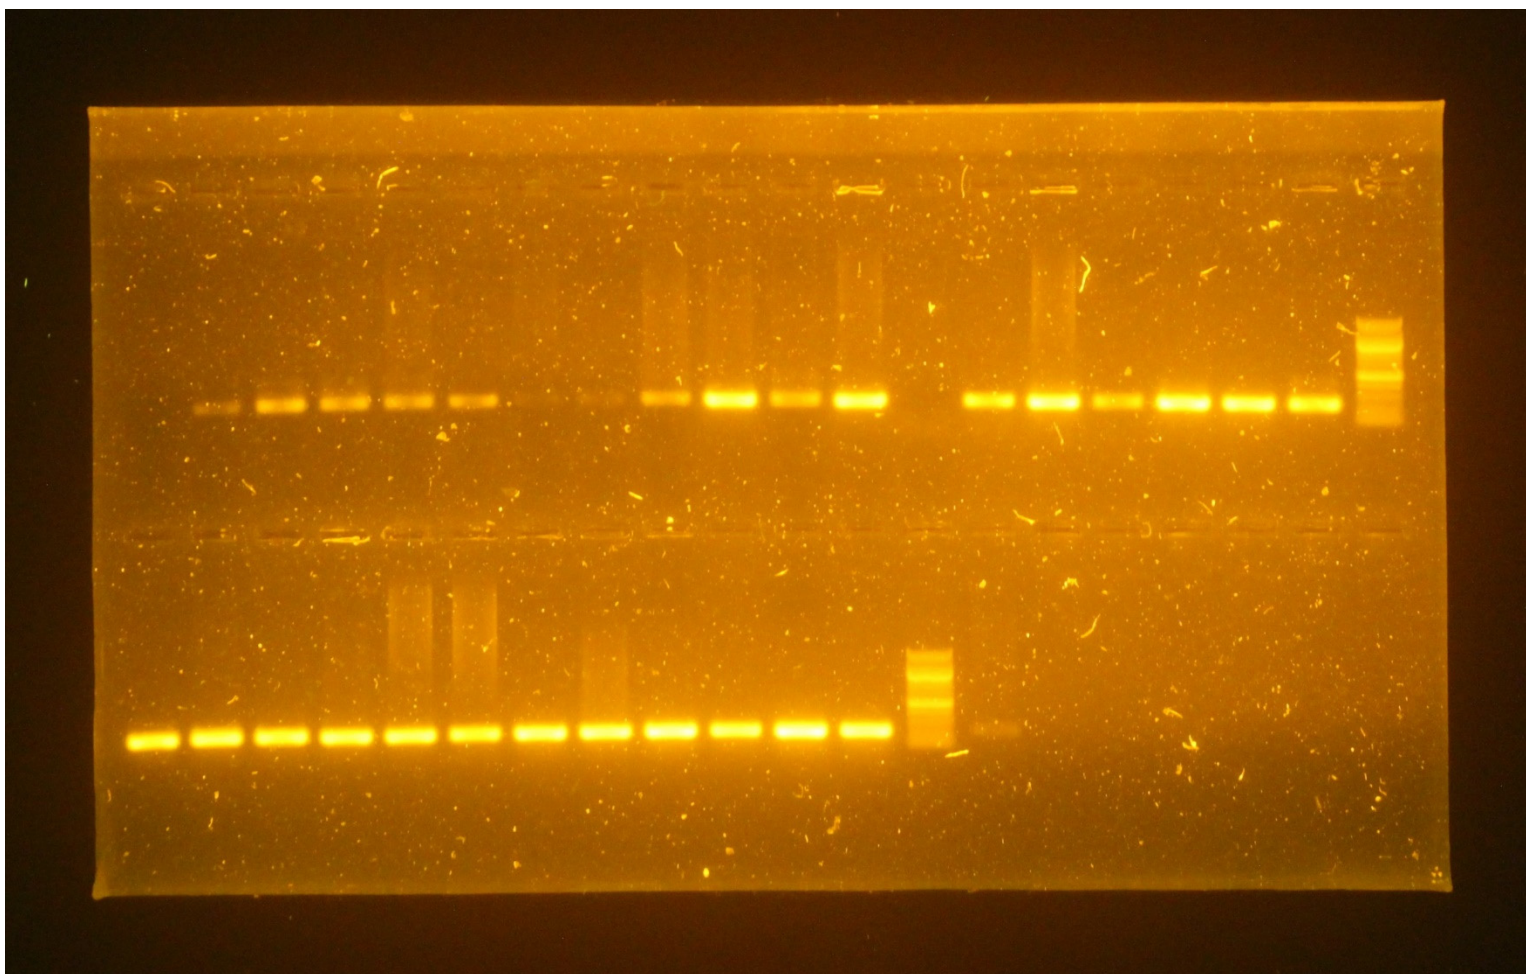

**Figure S4: Detection of the Presence of norB Gene (Sample 01-30) in the Clinical Isolates of *Staphylococcus aureus***



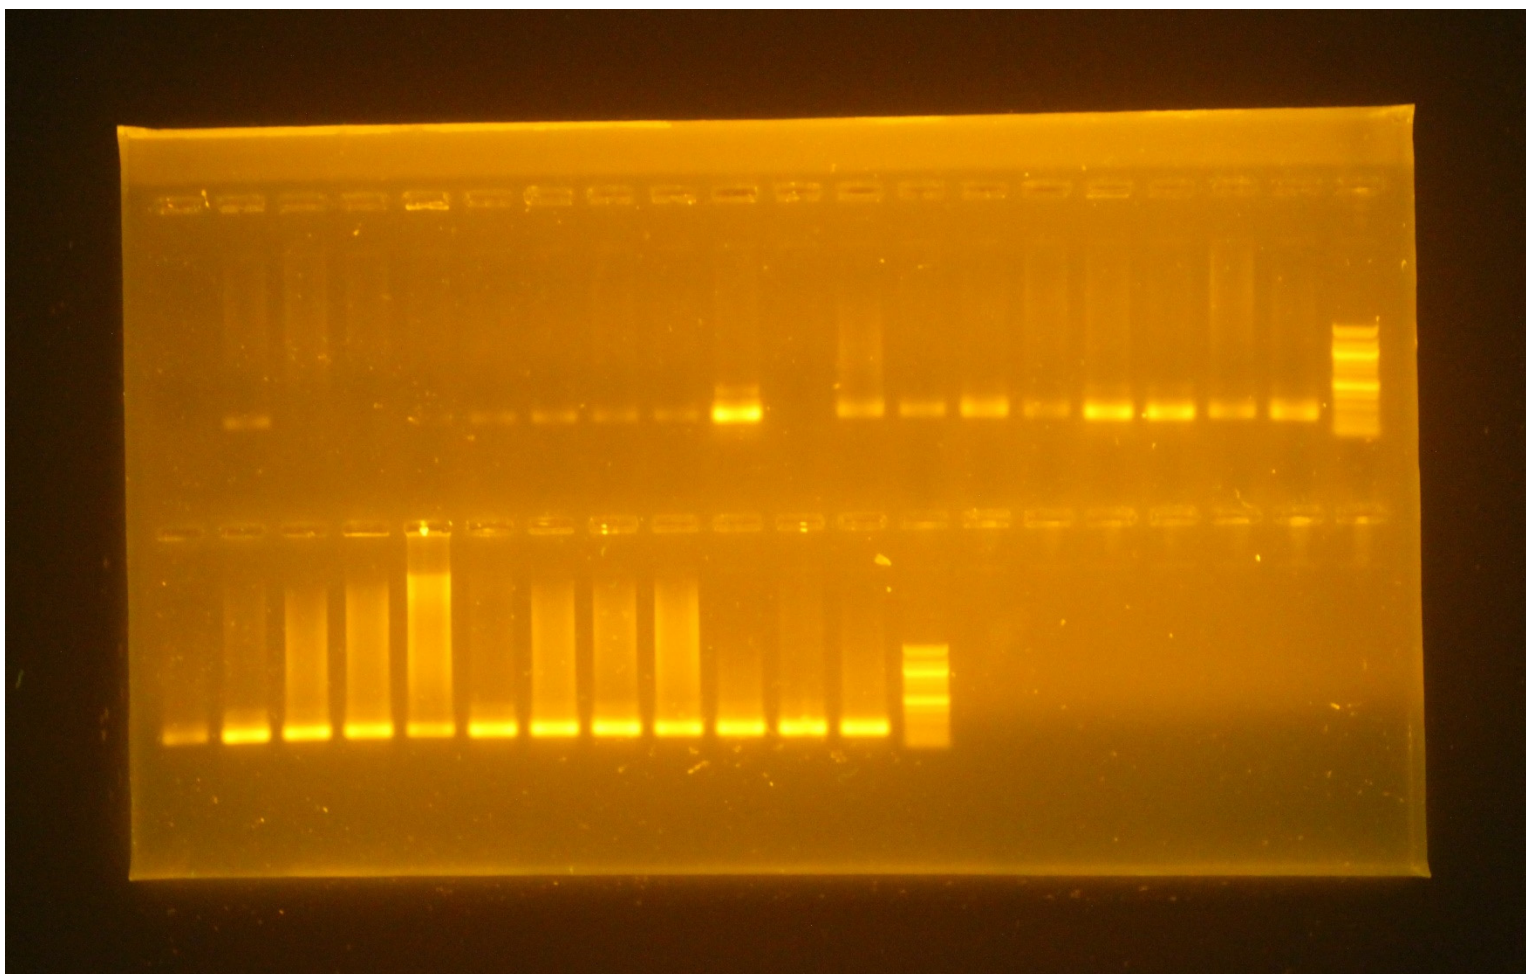

**Figure S5: Detection of the Presence of norB Gene (Sample 31-60) in the Clinical Isolates of *Staphylococcus aureus***

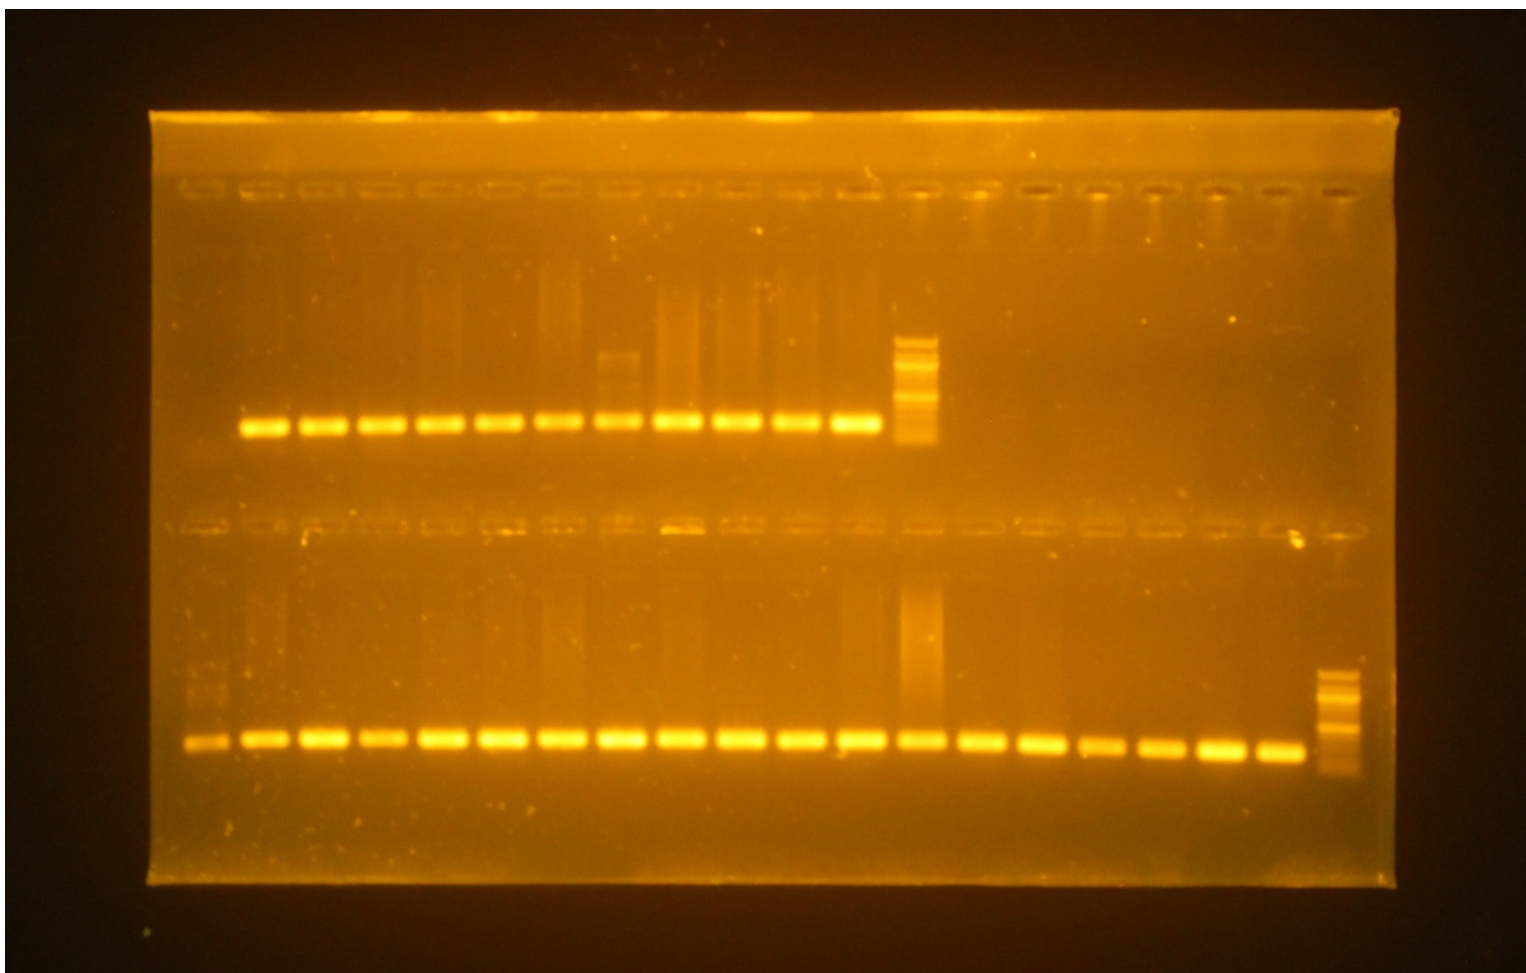

**Figure S6: Detection of the Presence of norC Gene (Sample 01-30) in the Clinical Isolates of *Staphylococcus aureus***

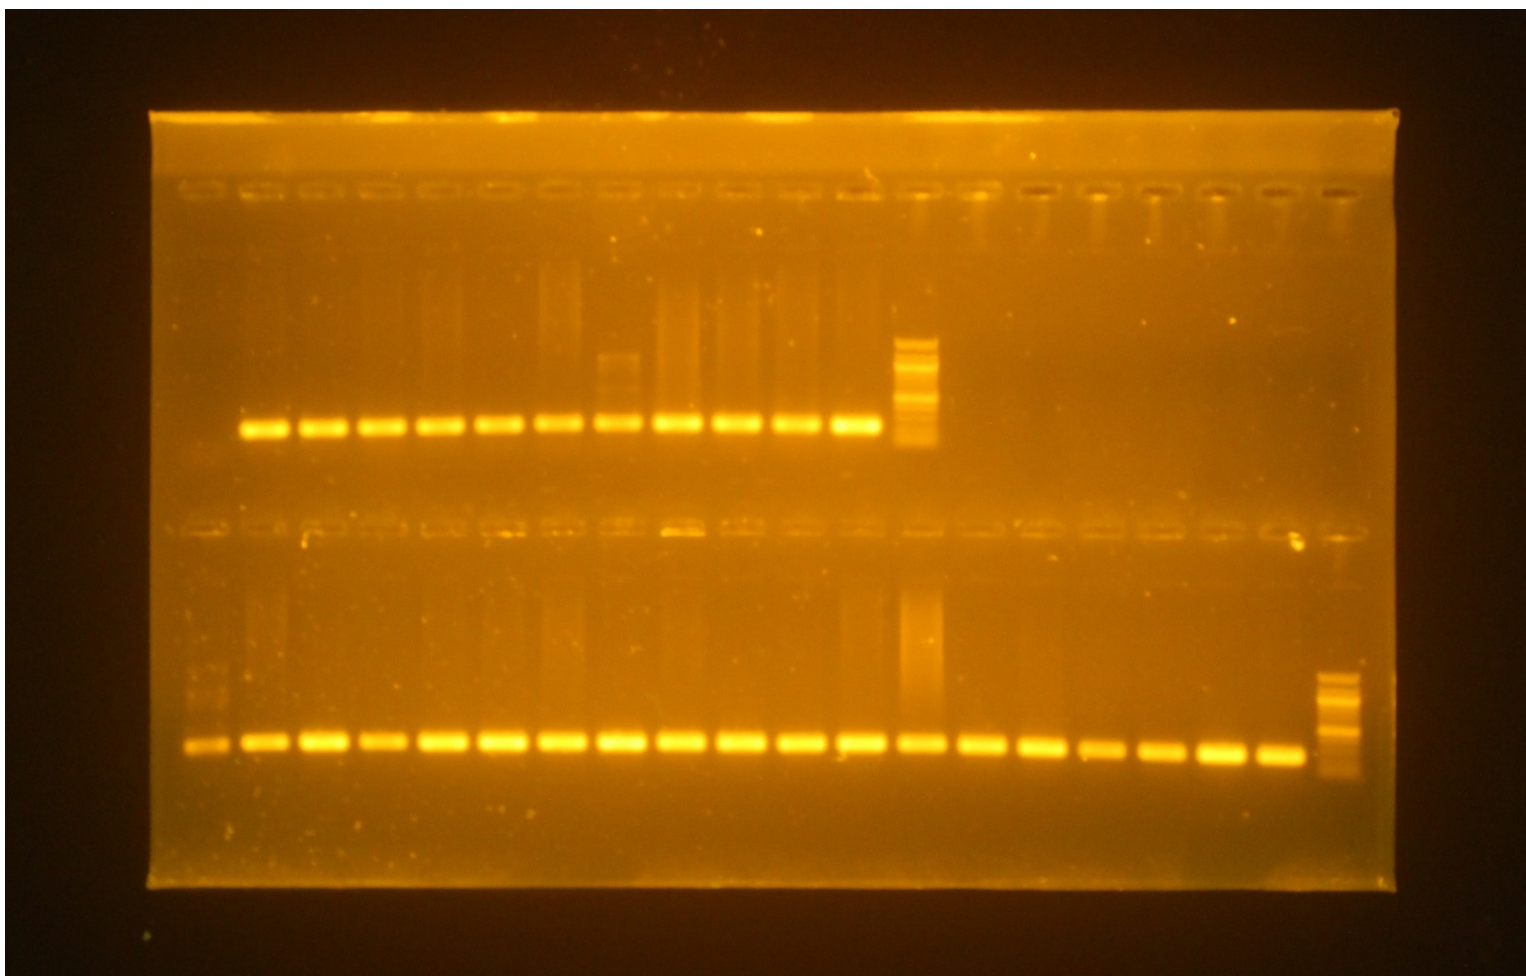

**Figure S7: Detection of the Presence of norC Gene (Sample 31-60) in the Clinical Isolates of *Staphylococcus aureus***



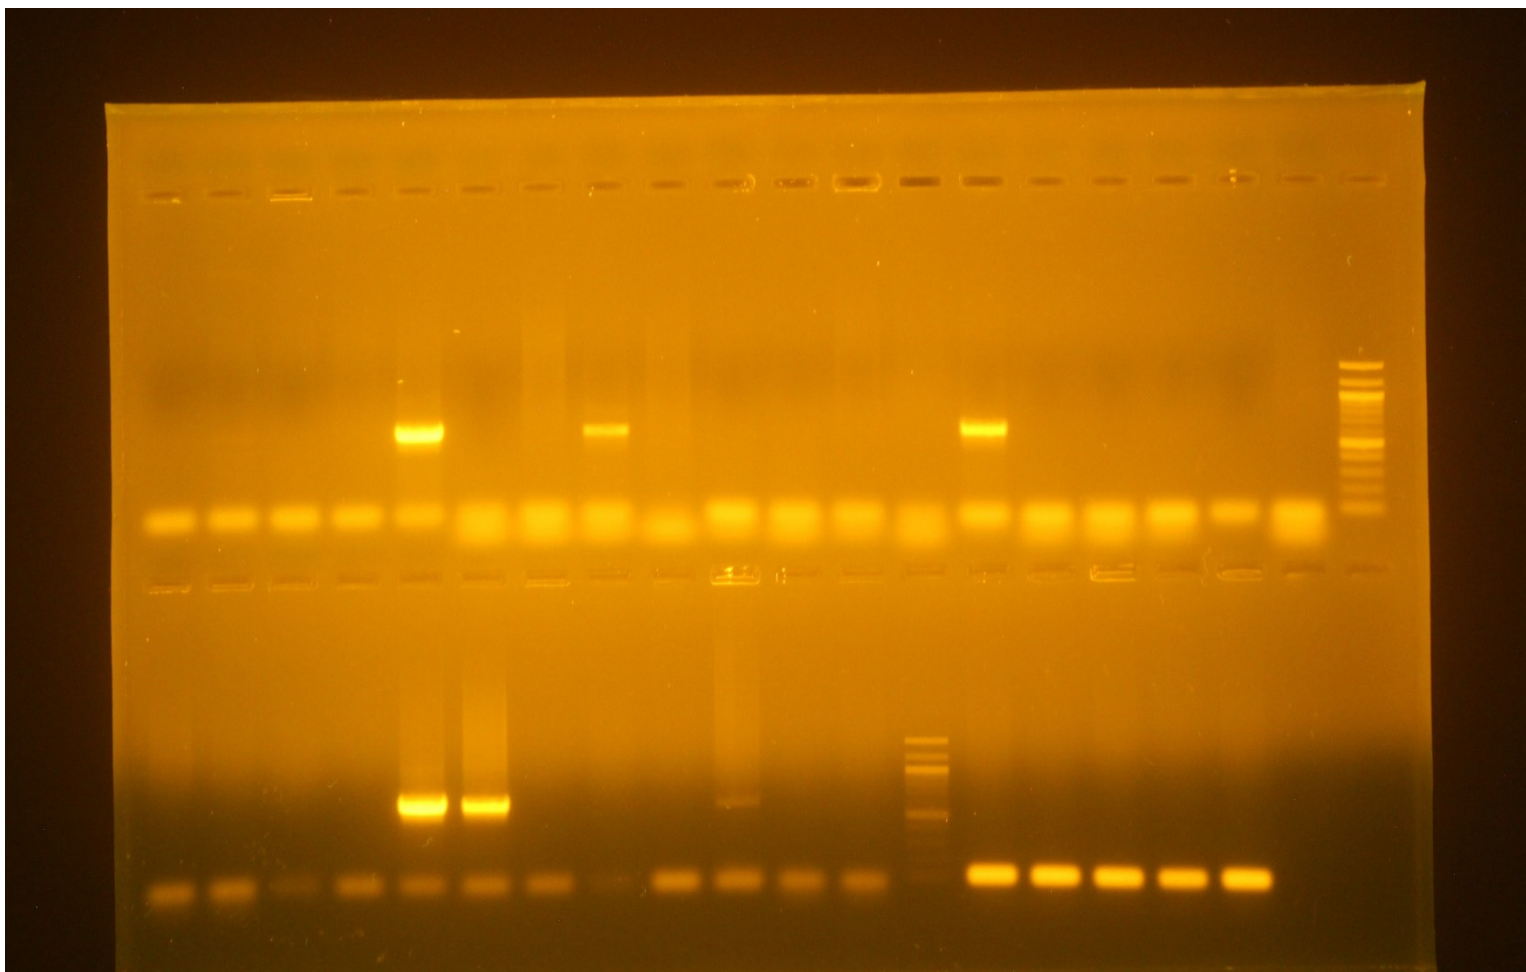

**Figure S8: Detection of the Presence of qacAB Gene (Sample 1-30) and sepA (Sample 26-30) in the Clinical Isolates of *Staphylococcus aureus***

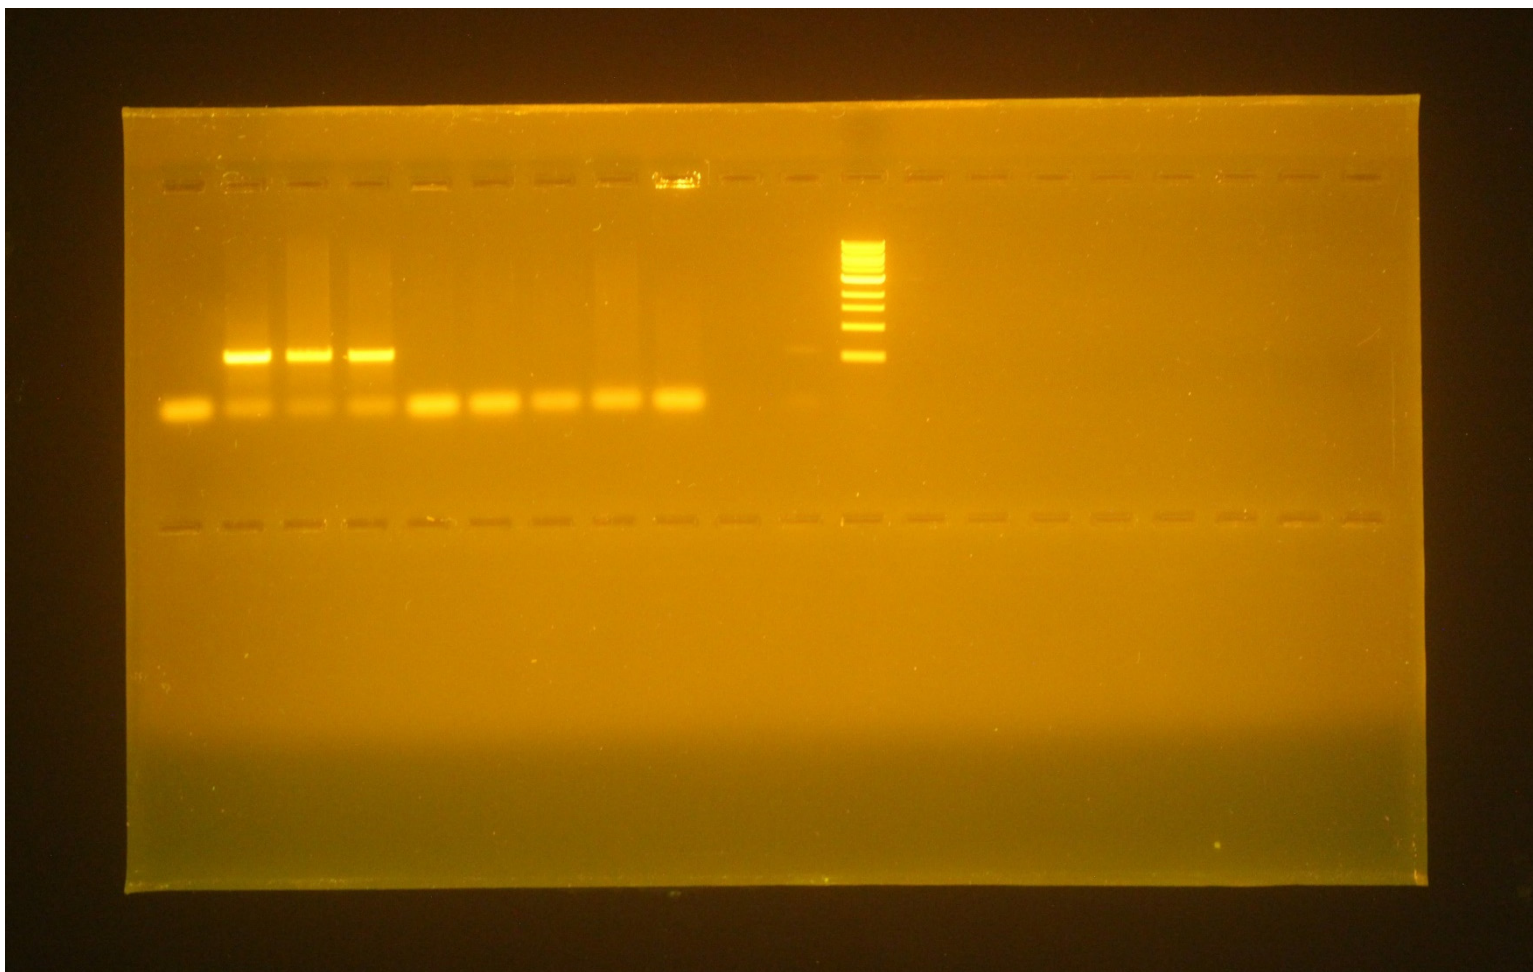

**Figure S9: Detection of the Presence of qacAB Gene (Sample 31-40) in the Clinical Isolates of *Staphylococcus aureus***

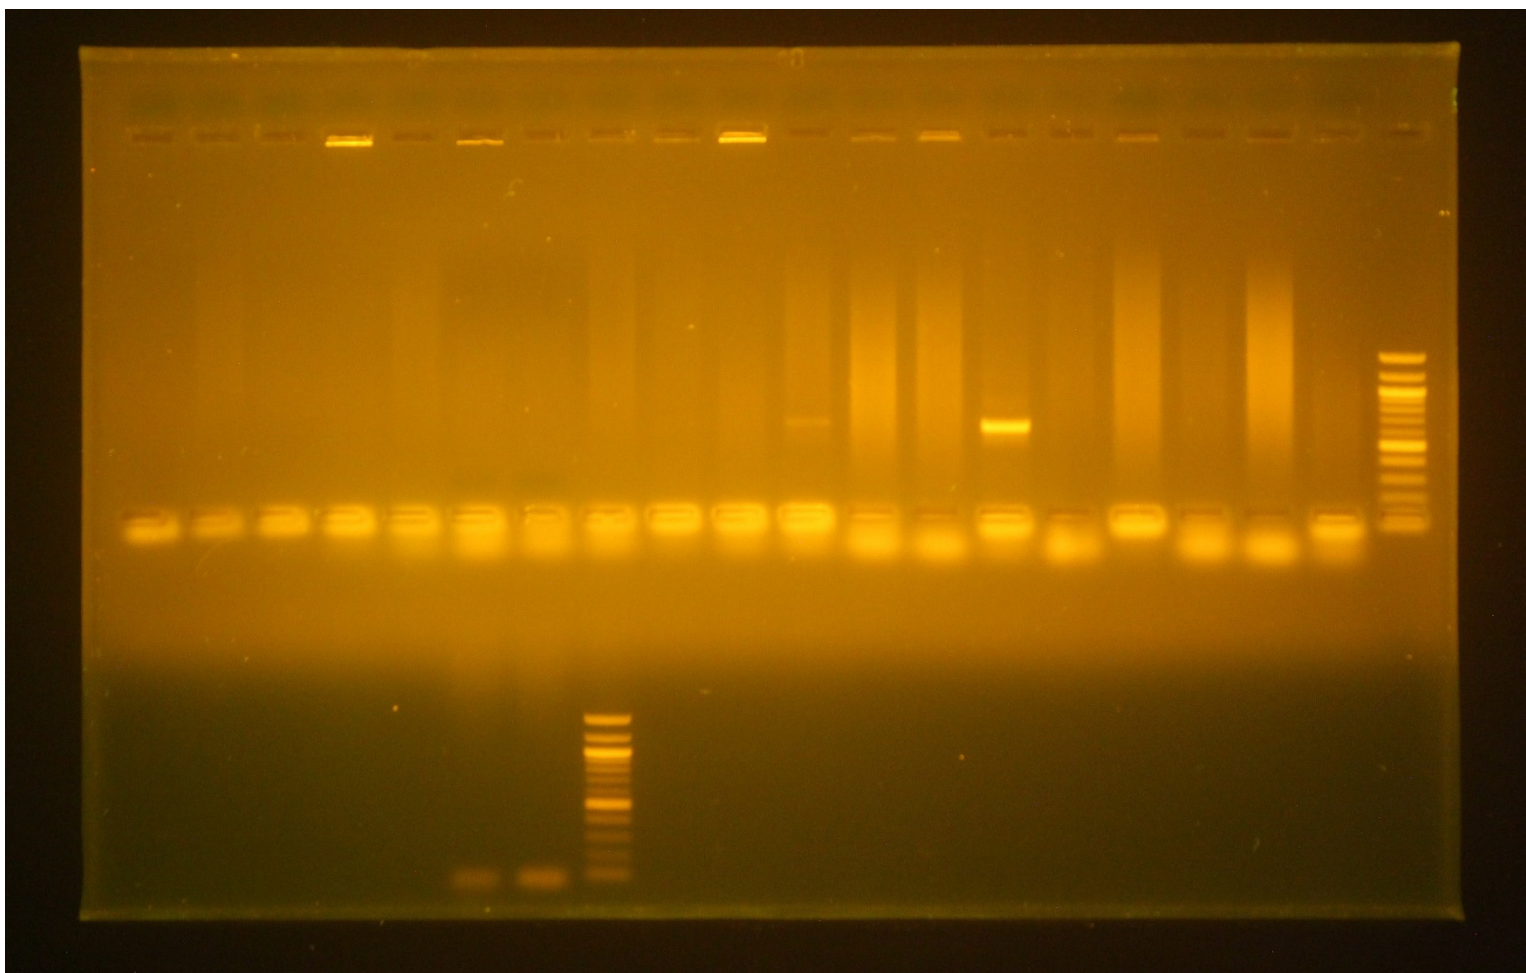

**Figure S10: Detection of the Presence of qacAB Gene (Sample 41-60) in the Clinical Isolates of *Staphylococcus aureus***



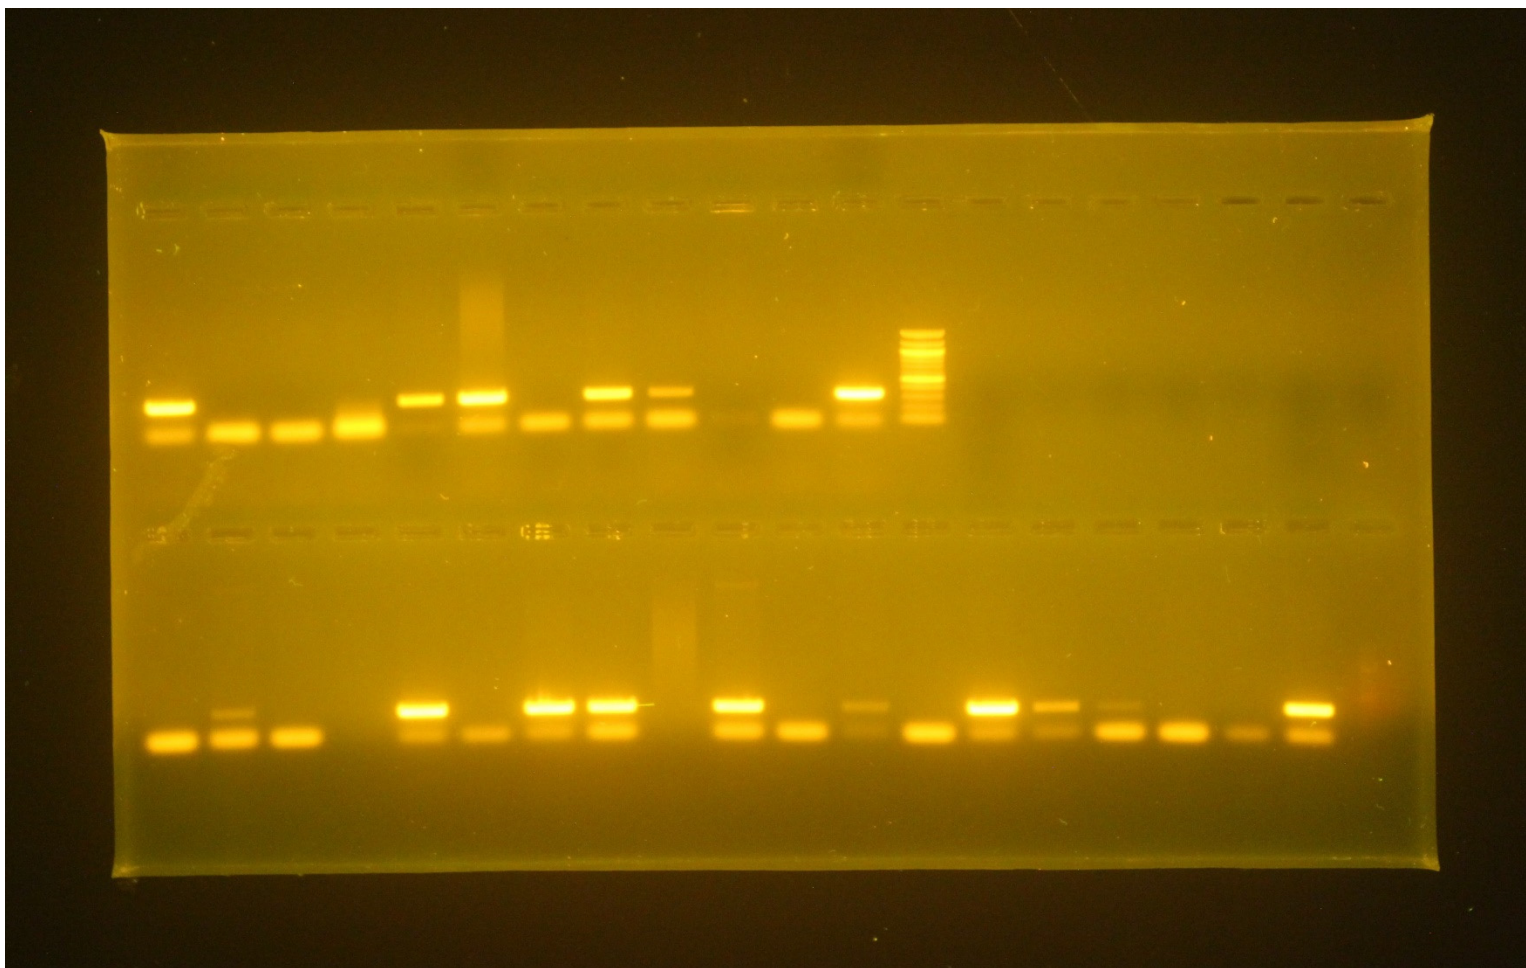

**Figure S11: Detection of the Presence of mecA Gene (Sample 1-30) in the Clinical Isolates of *Staphylococcus aureus***

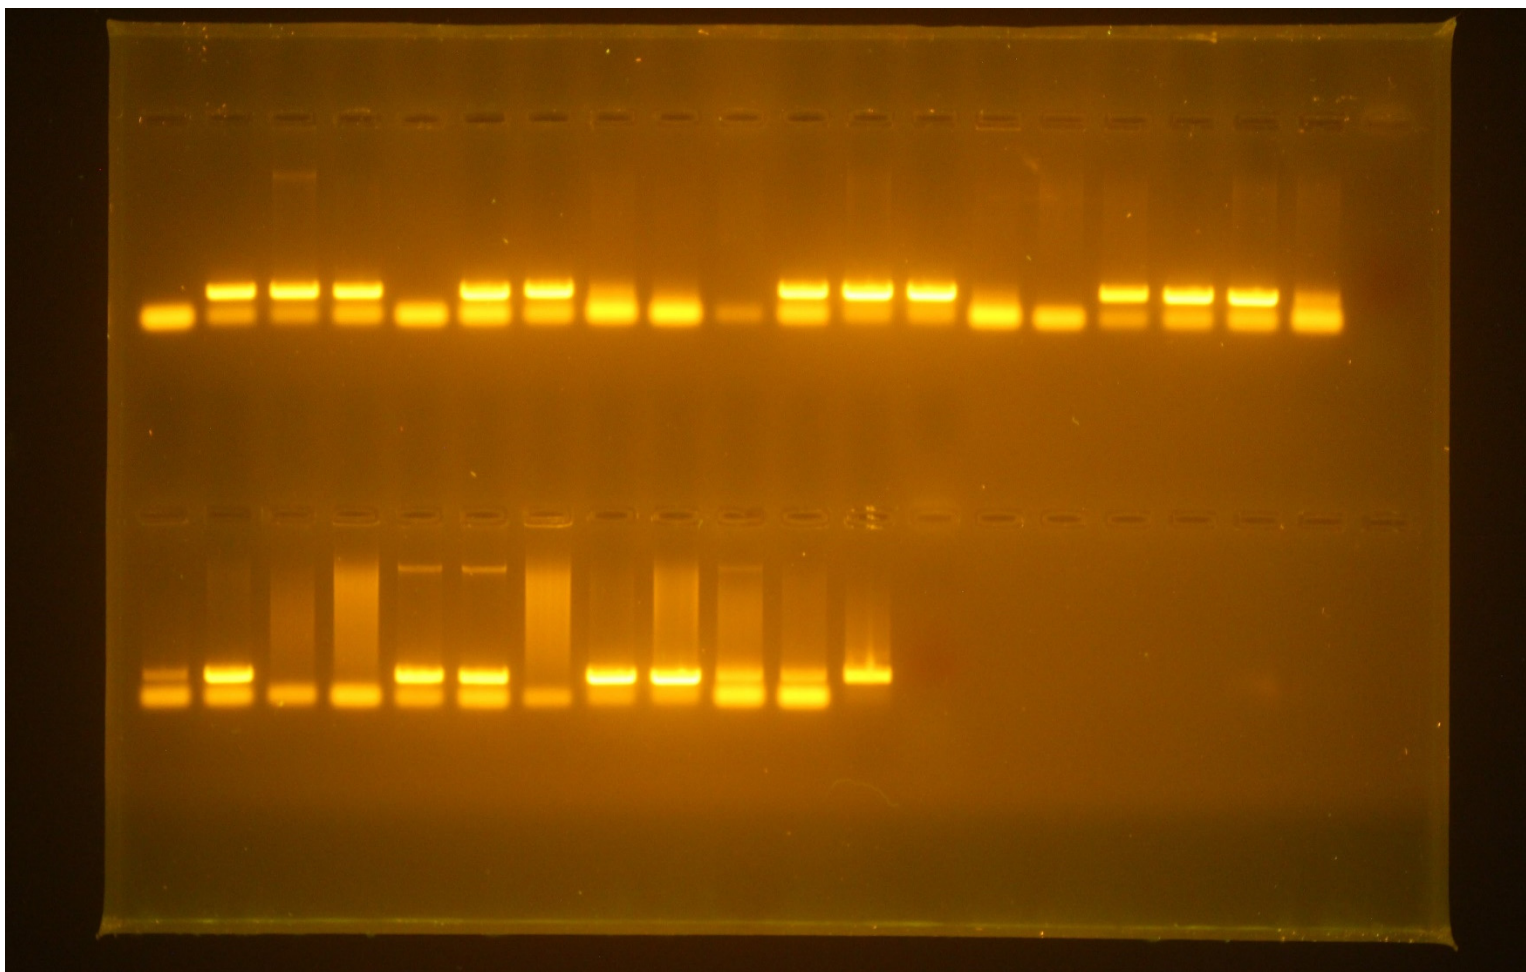

**Figure S12: Detection of the Presence of mecA Gene (Sample 31-60) in the Clinical Isolates of *Staphylococcus aureus***



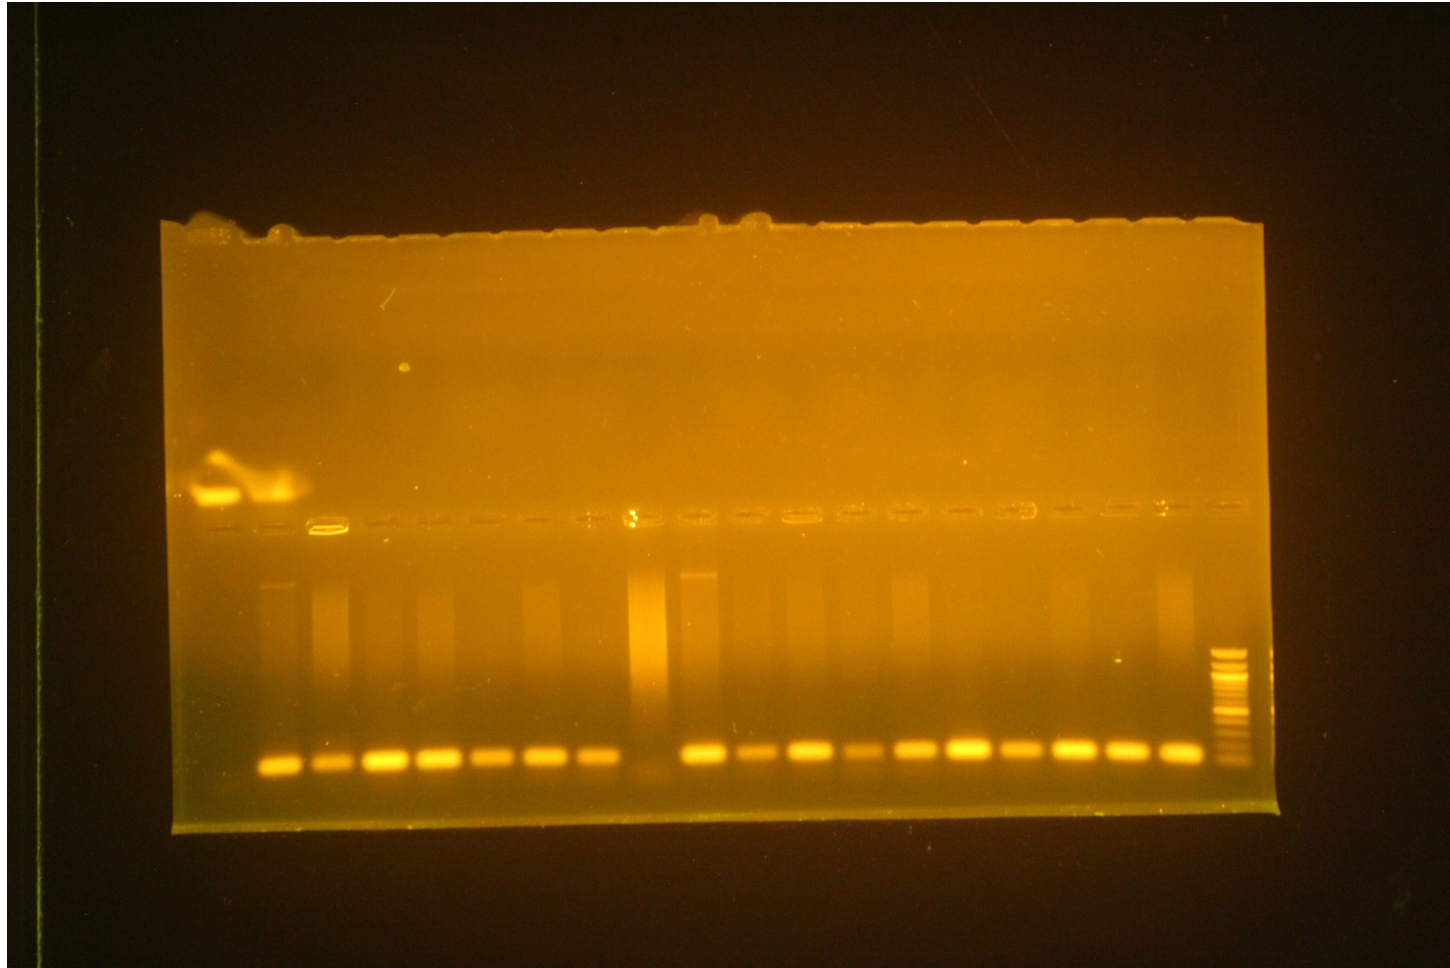

**Figure S13: Detection of the Presence of sepA Gene (Sample 1-18) in the Clinical Isolates of *Staphylococcus aureus***



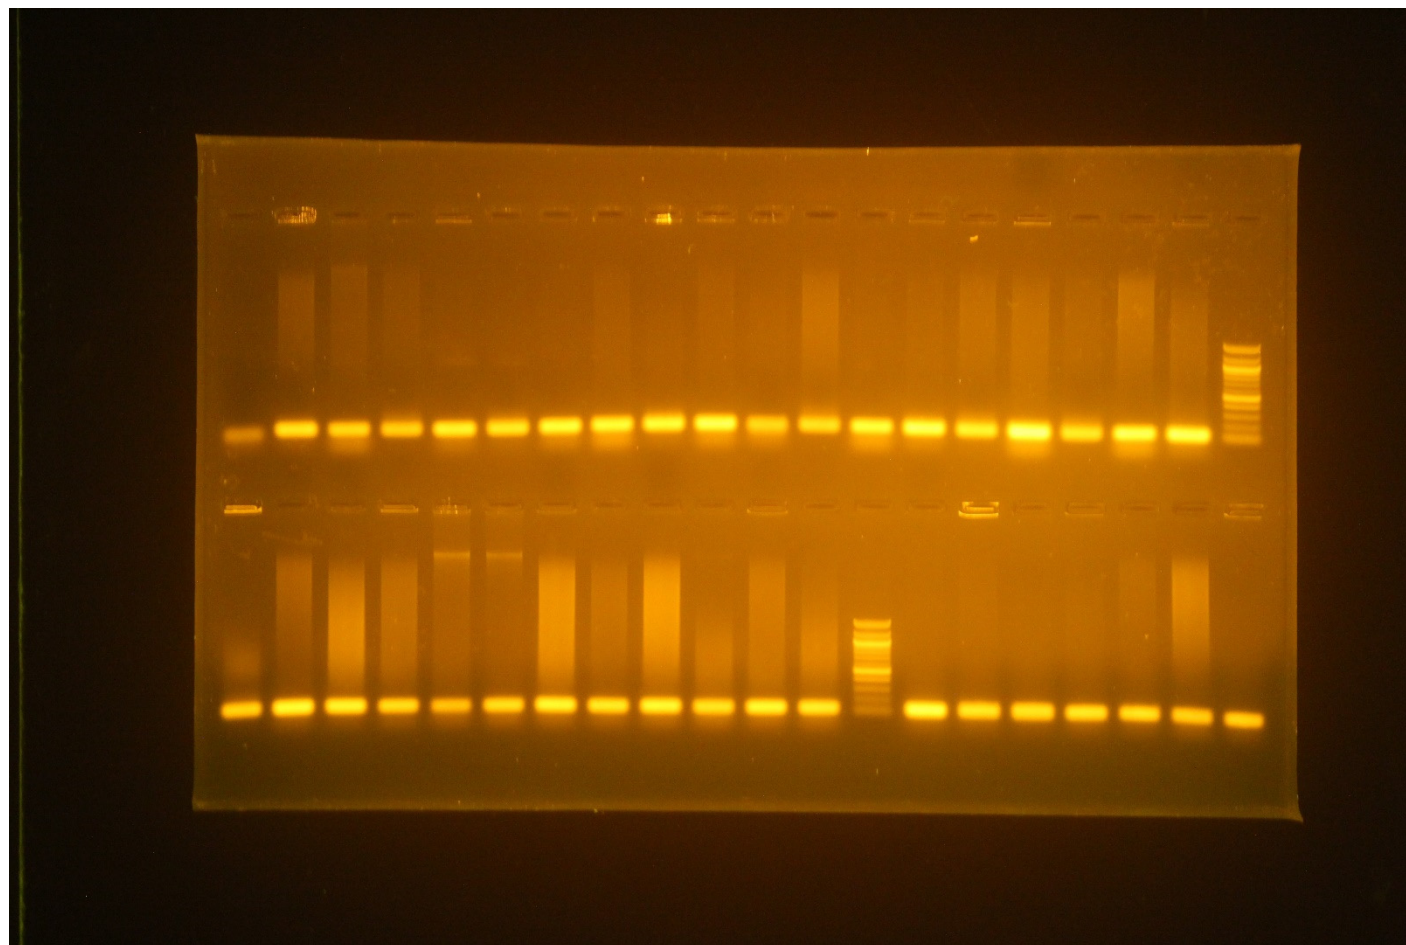

**Figure S14: Detection of the Presence of sepA Gene (Sample 31-60; 19-25) in the Clinical Isolates of *Staphylococcus aureus***

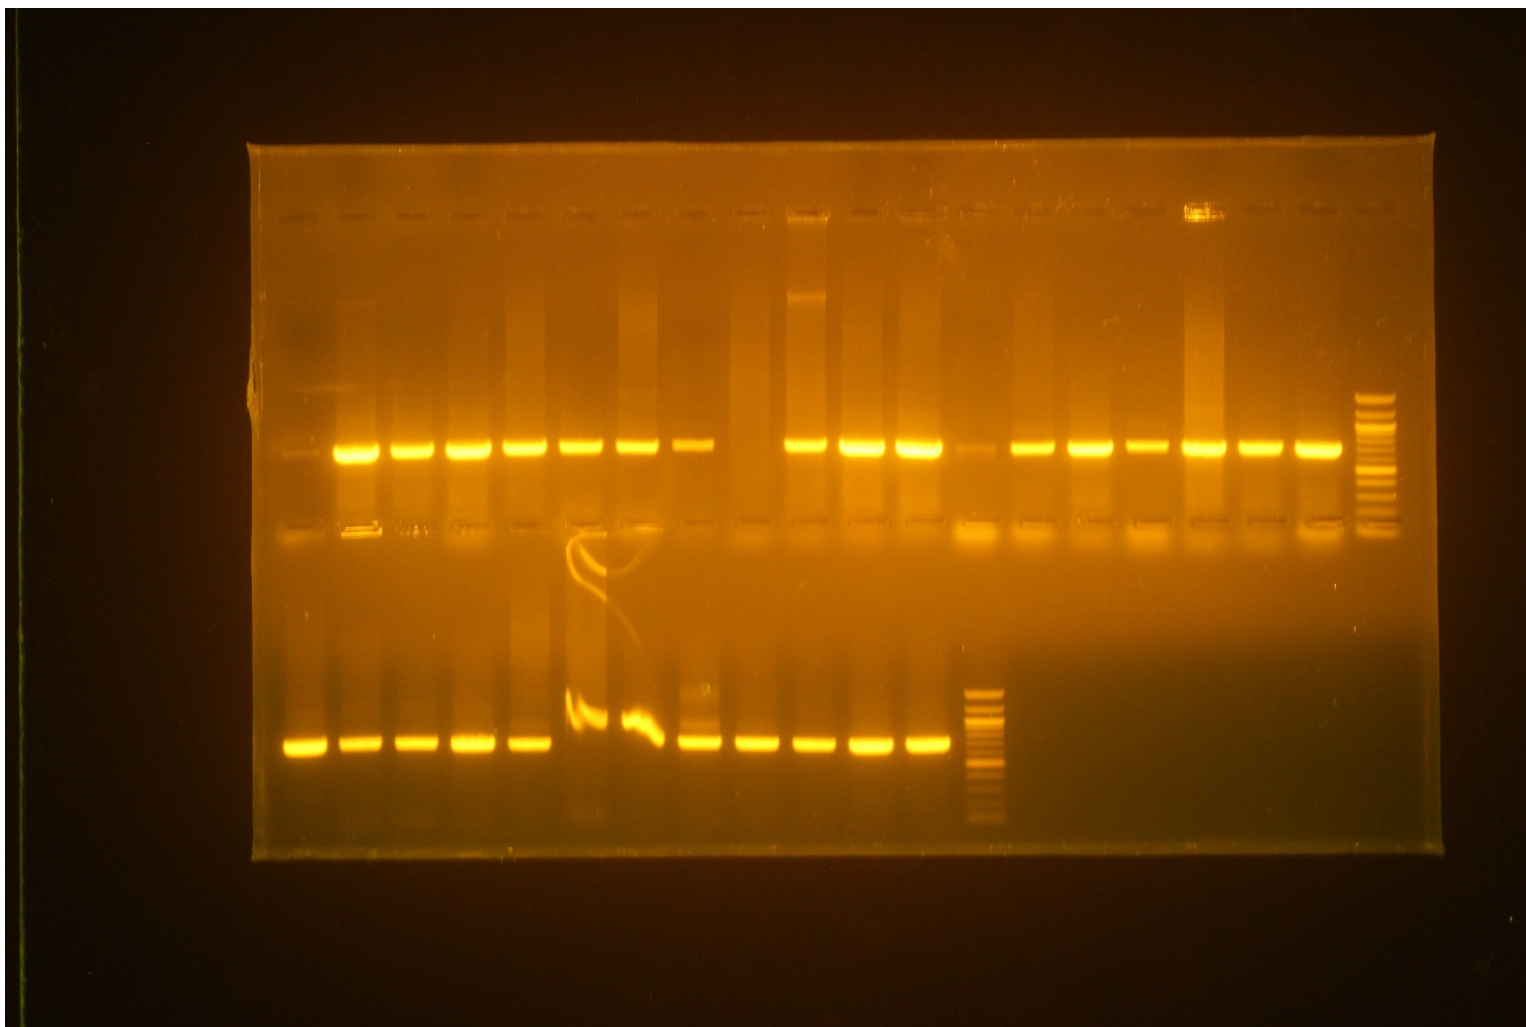

**Figure S15: Detection of the Presence of mepA Gene (Sample 1-30) in the Clinical Isolates of *Staphylococcus aureus***

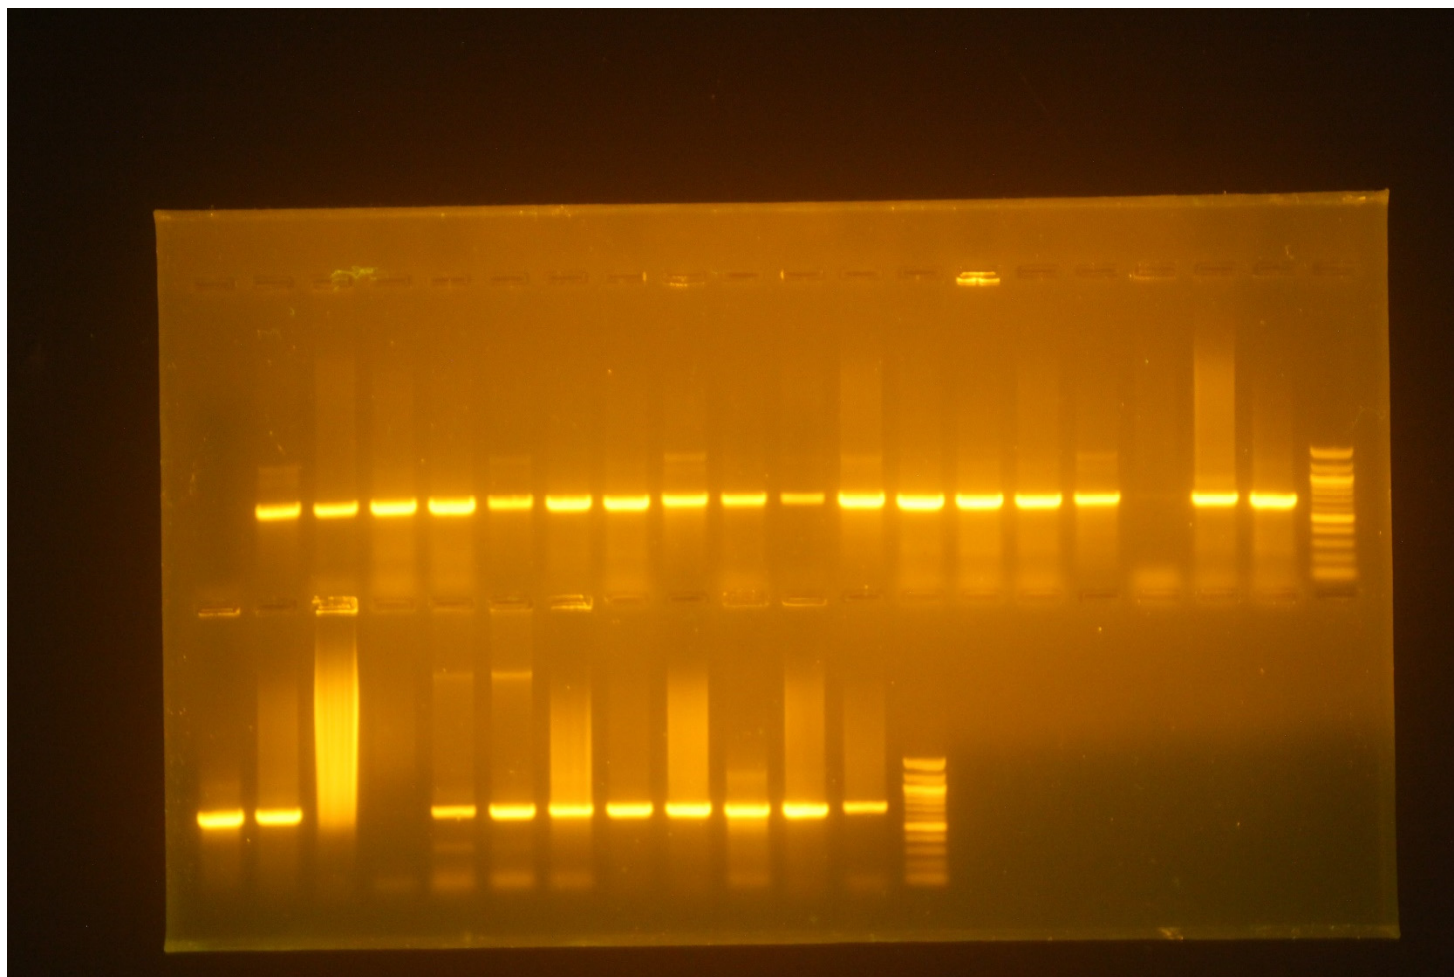

**Figure S16: Detection of the Presence of mepA Gene (Sample 31-60) in the Clinical Isolates of *Staphylococcus aureus***



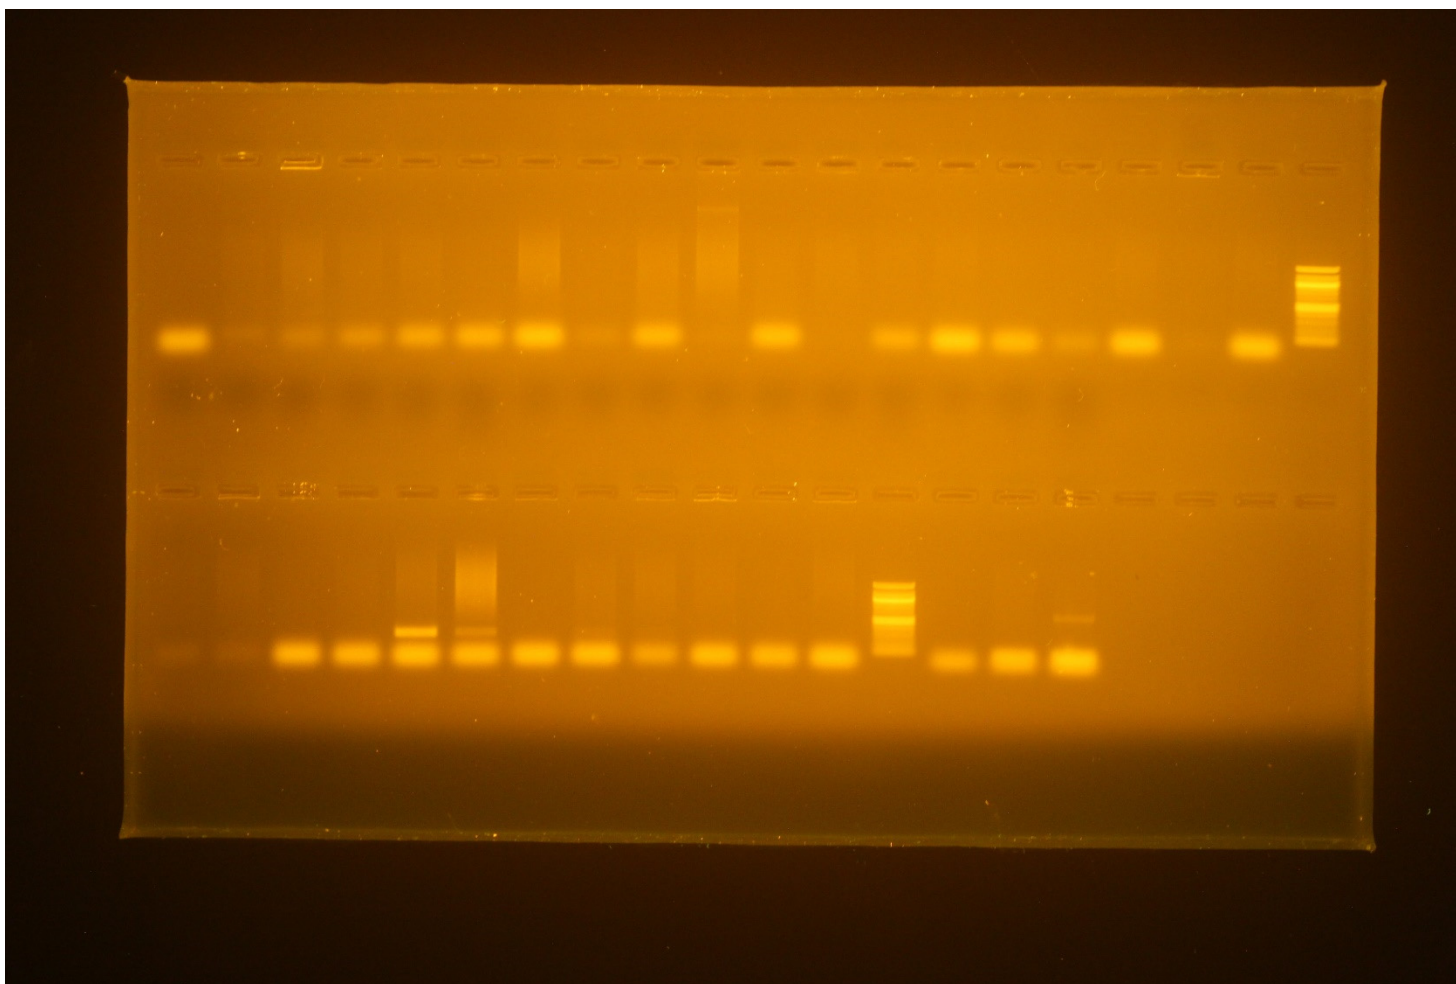

**Figure S17: Detection of the Presence of smr Gene (Sample 1-30) in the Clinical Isolates of *Staphylococcus aureus***

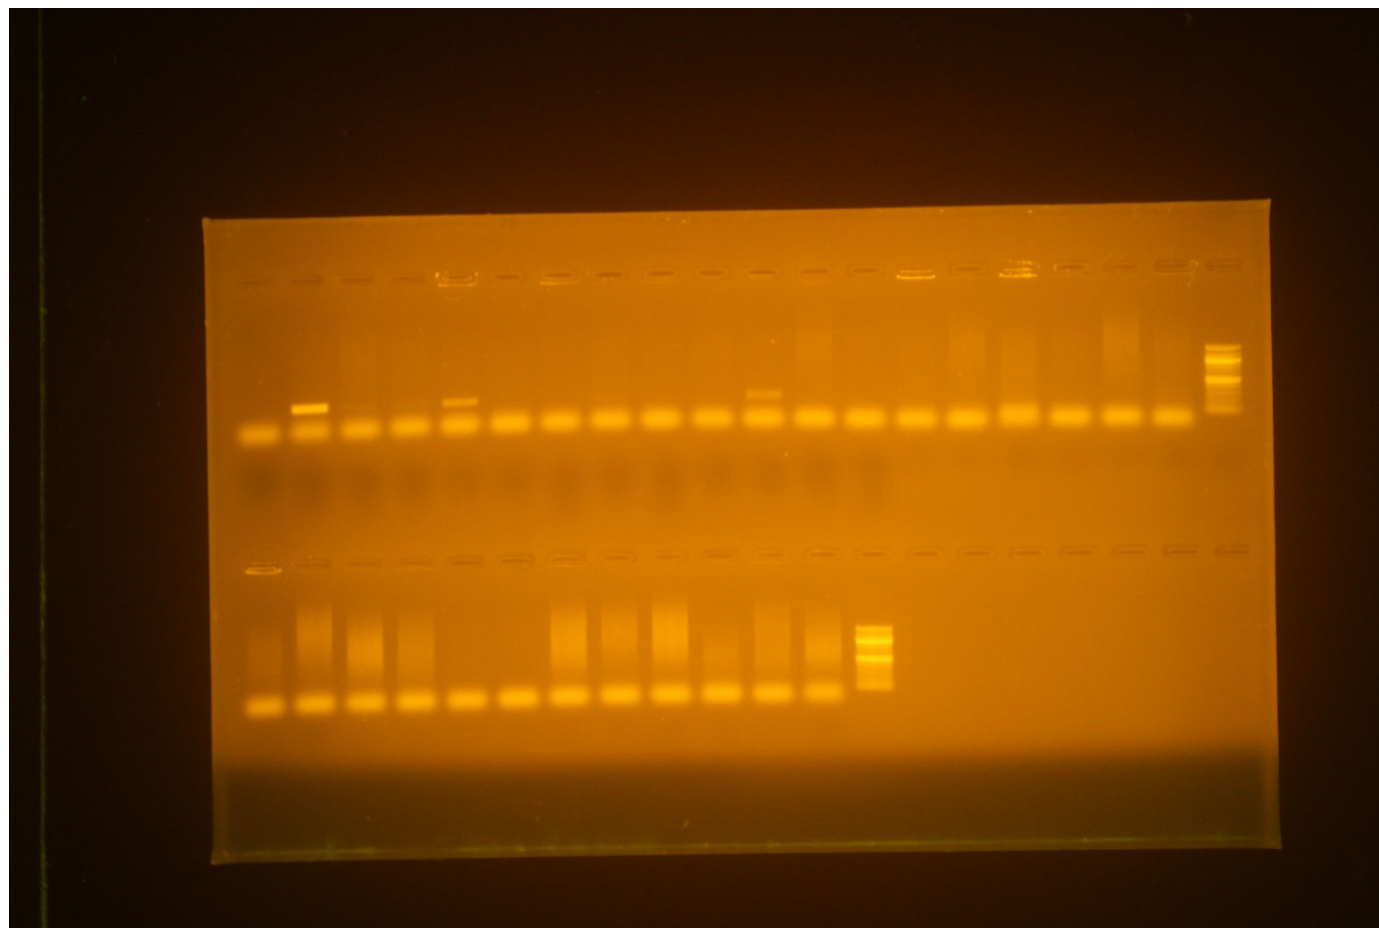

**Figure S18: Detection of the Presence of smr Gene (Sample 31-60) in the Clinical Isolates of *Staphylococcus aureus***

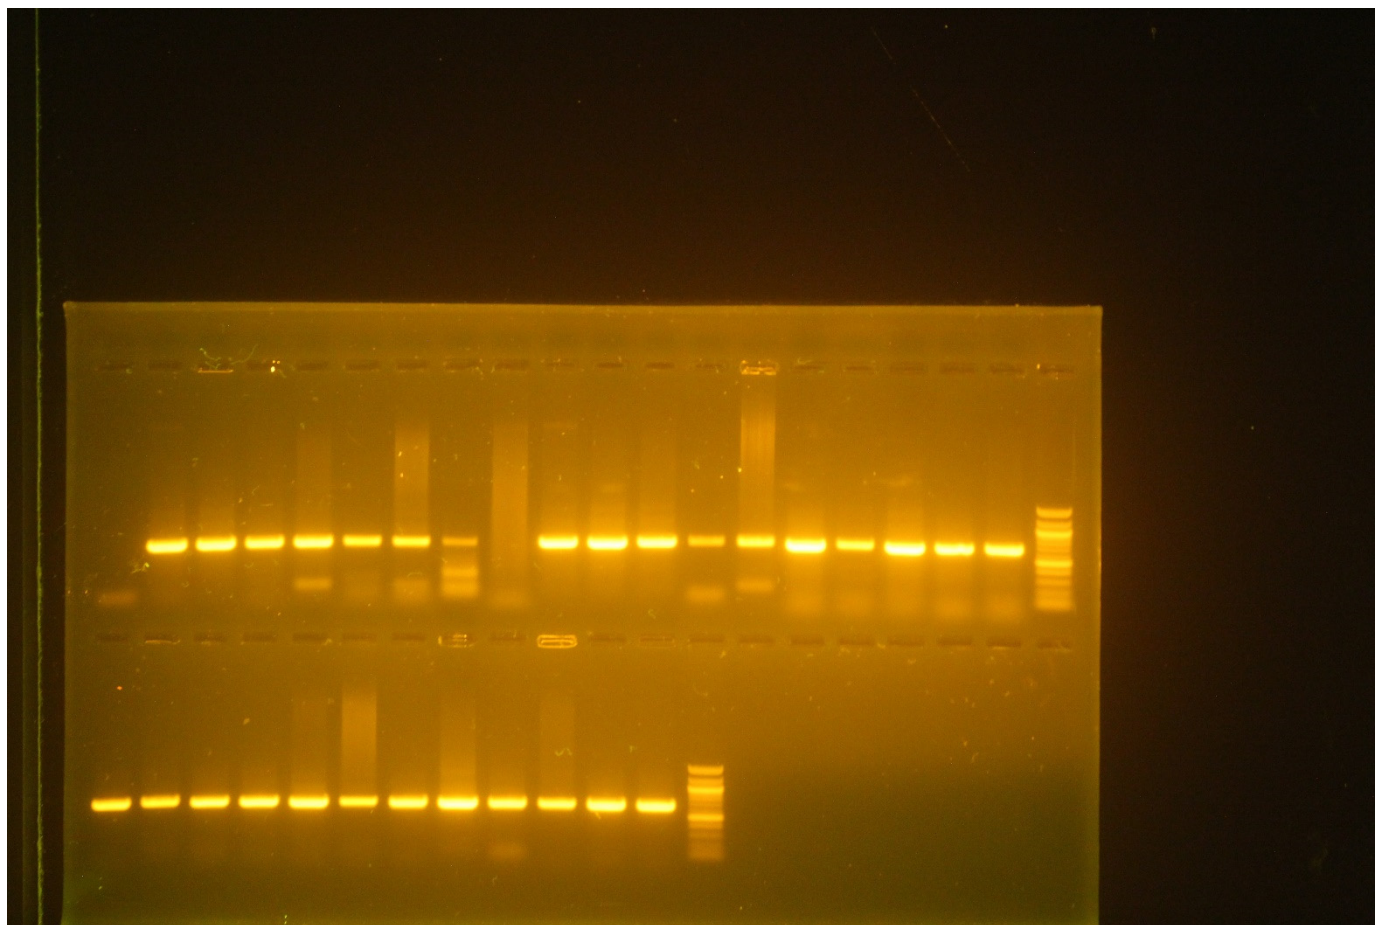

**Figure S19: Detection of the Presence of mdeA Gene (Sample 1-30) in the Clinical Isolates of *Staphylococcus aureus***



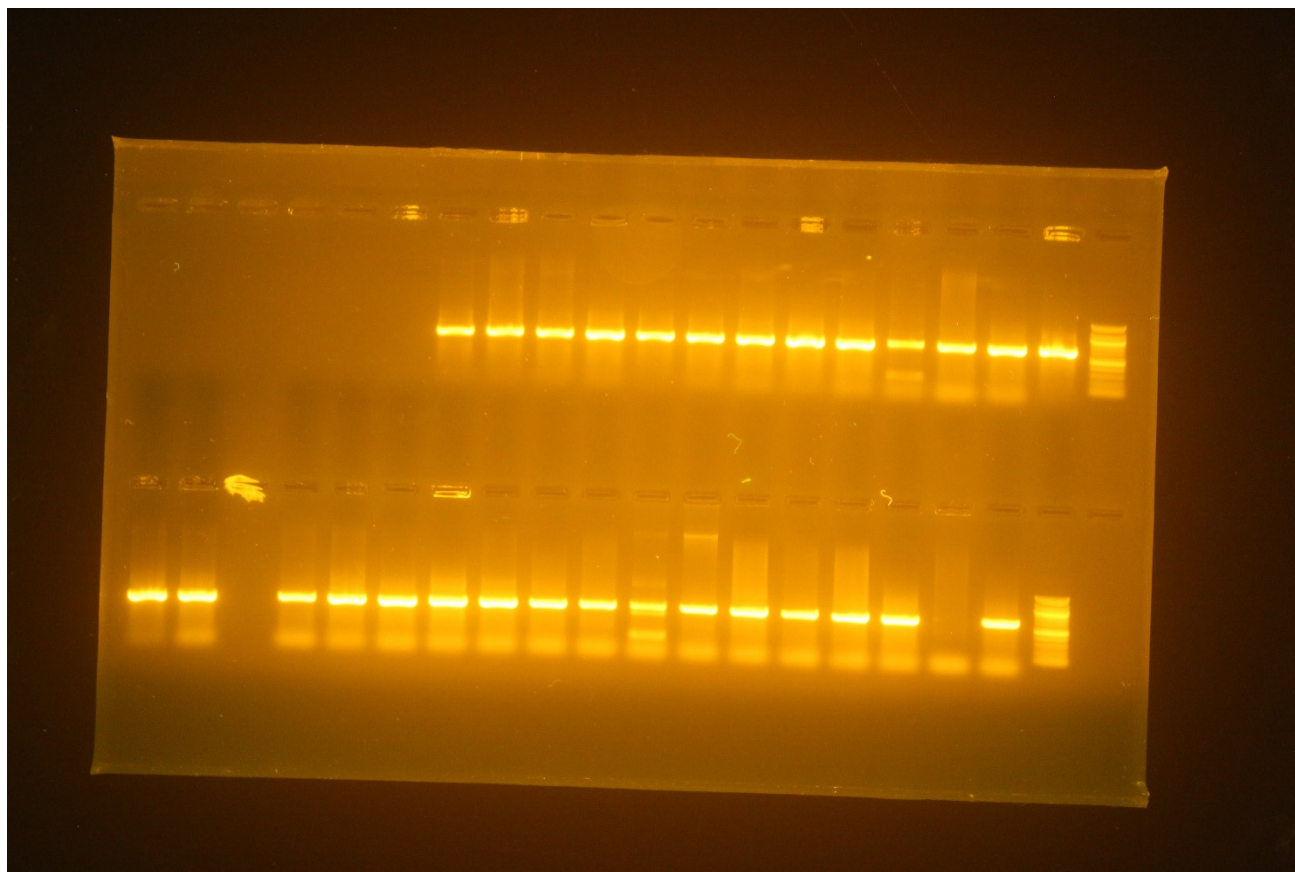

**Figure S20: Detection of the Presence of mdeA Gene (Sample 31-60) in the Clinical Isolates of *Staphylococcus aureus***
